1 **TITLE:** Phosphatidylethanolamine made in the inner mitochondrial membrane is essential for  
2 yeast cytochrome *bc*<sub>1</sub> complex function

3 **AUTHORS:** Elizabeth Calzada<sup>1</sup>, J. Michael McCaffery<sup>2</sup>, and Steven M. Claypool<sup>1\*</sup>

4 **AFFILIATIONS:**

5 <sup>1</sup> Department of Physiology, Johns Hopkins University School of Medicine, Baltimore, MD, USA

6 <sup>2</sup>Integrated Imaging Center, Department of Biology, Johns Hopkins University, Baltimore, MD

7  
8 **CORRESPONDING AUTHOR:** Steven M. Claypool, Dept. of Physiology, Johns Hopkins School  
9 of Medicine, 725 N. Wolfe St., Baltimore, MD 21225-2185. Tel. (410) 614-1786; Fax. (410) 955-  
10 0461; E-mail: [sclaypo1@jhmi.edu](mailto:sclaypo1@jhmi.edu)

11

12 **ABSTRACT:**

13         Of the four separate PE biosynthetic pathways in eukaryotes, one occurs in the  
14 mitochondrial inner membrane (IM) and is executed by phosphatidylserine decarboxylase  
15 (Psd1p). Deletion of Psd1, which is lethal in mice, compromises mitochondrial function. We  
16 hypothesize that this reflects inefficient import of non-mitochondrial PE into the IM. To test this,  
17 we re-wired PE metabolism in yeast by re-directing Psd1p to the outer mitochondrial membrane  
18 or the endomembrane system. Our biochemical and functional analyses identified the IMS as  
19 the greatest barrier for PE import and demonstrated that PE synthesis in the IM is critical for  
20 cytochrome *bc*<sub>1</sub> complex (III) function. Importantly, mutations predicted to disrupt a conserved  
21 PE-binding site in the complex III subunit, Qcr7p, impaired complex III activity similar to *PSD1*  
22 deletion. Collectively, these data demonstrate that PE made in the IM by Psd1p is critical to  
23 support the intrinsic functionality of complex III and establish one likely mechanism.

24 **INTRODUCTION:**

25         The evolutionary design of living cells has revealed redundancies in various metabolic  
26 pathways to promote survival. Importantly however, the sequestration of enzymes and their

27 substrates into different membrane compartments allows for the enrichment and regulation of  
28 metabolite synthesis in regions of the cell where they are essential. Such is the case for the  
29 biosynthesis of the abundant membrane phospholipid, phosphatidylethanolamine (PE). In  
30 mammalian cells PE is synthesized by four separate pathways, three of which localize to the  
31 endoplasmic reticulum (ER) <sup>1</sup>. A final pathway is dependent on phosphatidylserine  
32 decarboxylase (Psd1p) which is spatially isolated within the mitochondrial inner membrane (IM)  
33 <sup>2-5</sup>. The predominant pathways for PE production include the Kennedy pathway, which  
34 synthesizes PE through the stepwise conjugation of CDP-ethanolamine to diacylglycerol (DAG),  
35 and the Psd pathway which utilizes phosphatidylserine (PS) as a substrate to generate PE <sup>1</sup>. In  
36 multicellular organisms, preference for either the Kennedy pathway or the Psd pathway varies  
37 between tissues and cell types <sup>6</sup>. Notably, deletion of either pathway is lethal during murine  
38 embryogenesis, highlighting the importance of PE generation in both the ER and mitochondrial  
39 compartments for development <sup>7,8</sup>.

40 Conservation of the Psd pathway from bacteria to humans likely reflects the  
41 endosymbiotic origin of mitochondria which in turn suggests that mitochondrial PS and PE  
42 metabolism has been preserved to optimize mitochondrial performance <sup>6</sup>. Indeed, deletion of  
43 phosphatidylserine decarboxylase (*Pisd* in mouse and humans and *PSD1* in yeast) in eukaryotic  
44 cells decreases cellular growth, impairs oxidative phosphorylation, produces aberrant  
45 mitochondrial morphology, and diminishes PE levels in cells and mitochondria <sup>7,9-12</sup>. The Psd  
46 pathway is the predominant pathway for PE production in *Saccharomyces cerevisiae* and  
47 produces up to 70% of PE in the cell <sup>13</sup>. In contrast to mammals, yeast additionally contain  
48 Psd2p which localizes to either Golgi or endosomal compartments <sup>5,14</sup>. Deletion of *PSD2* alone  
49 does not recapitulate any of the mitochondrial defects associated with loss of *PSD1*, further  
50 emphasizing the importance of the mitochondrial PE biosynthetic pathway <sup>5</sup>. The combined  
51 absence of *PSD1* and *PSD2* produces a strain that is auxotrophic for exogenous ethanolamine  
52 supplementation which is used to generate PE through the Kennedy pathway. As the severity of

53 PE depletion can be genetically and metabolically adjusted in yeast, this organism has served  
54 as an invaluable model for studying the importance of the mitochondrial Psd pathway for cellular  
55 respiration.

56 Characterization of the Psd pathway over more than 50 years of research has revealed  
57 detailed mechanistic insight into the biogenesis of the mature Psd1p enzyme <sup>15</sup>. In yeast, *PSD1*  
58 is a nuclear encoded gene whose transcript is translated on cytosolic ribosomes which produce  
59 a full-length zymogen that is catalytically inactive. Upon its mitochondrial import, two matrix  
60 metalloproteases sequentially process the N-terminus of Psd1p which then undergoes a third  
61 processing event that is executed internally by the enzyme itself at the conserved C-terminal  
62 LGST motif <sup>2,3</sup>. This unique autocatalytic processing event severs Psd1p into a large  
63 membrane-anchored  $\beta$  subunit and a small  $\alpha$  subunit and is performed by a self-contained  
64 catalytic triad typical of serine proteases <sup>16,17</sup>. Self-processing endows the small  $\alpha$  subunit with  
65 an N-terminal pyruvoyl prosthetic group that is crucial for its decarboxylase activity. Post-  
66 cleavage, the two Psd1p subunits remain non-covalently associated within the inner membrane  
67 where they decarboxylate PS to PE <sup>17</sup>.

68 The substrate of Psd1p, PS, is synthesized on the mitochondrial-associated membrane  
69 (MAM) of the ER by phosphatidylserine synthase (Cho1p) <sup>18</sup>. Thus, the amphipathic PS must be  
70 imported from the ER and traverse through two aqueous compartments, the cytosol and the  
71 mitochondrial intermembrane space (IMS), to reach Psd1p at the IM <sup>19</sup>. While the redundant  
72 roles played by ER-mitochondria membrane tethers in PS mitochondrial import continue to be  
73 elucidated <sup>20-24</sup>, recent evidence in yeast indicates that Mic60p, a subunit of the mitochondrial  
74 contact site and cristae organizing system (MICOS), works in conjunction with the soluble lipid  
75 carrier, Ups2p, to expose PS for Psd1p decarboxylation in the IMS <sup>25,26</sup>. Whether or not a  
76 parallel pathway exists for PE import into the IM remains unclear. The lethal consequence of  
77 *psid* deletion in mice and the failure of supplemental ethanolamine to rescue the respiratory

78 defects of *psd1Δ* yeast were taken as evidence that PE made outside of the mitochondrion is  
79 unable to compensate for the absence of Psd1p<sup>1,7,11,27</sup>. However, it was recently reported that  
80 PE made by the Kennedy pathway can in fact restore the impaired oxidative phosphorylation of  
81 *psd1Δ* yeast suggesting that extra-mitochondrial PE can compensate for the absence of the Psd  
82 pathway<sup>28</sup>.

83 Here, we sought to determine if either the cytosol and/or the IMS is a barrier that  
84 prevents PE made outside of the IM from rescuing the impaired oxidative phosphorylation that  
85 occurs in *S. cerevisiae* lacking Psd1p. Previously, we generated a chimeric Psd1p protein, ER-  
86 Psd1p, which is targeted to the endosomal compartment and is catalytically active<sup>29</sup>. In the  
87 current study, we further characterized the cell biology of ER-Psd1 yeast, together with an OM-  
88 targeted chimeric Psd1p (OM-Psd1p), to test if the cytosol, IMS, or both, are barriers that  
89 prevent non-mitochondrially produced PE from functionally rescuing the absence of PE made in  
90 the IM. Alongside strains expressing these re-directed Psd1p constructs, we compared the  
91 mitochondrial function of *psd1Δpsd2Δ* yeast grown in the non-fermentable carbon source,  
92 lactate, with or without exogenous ethanolamine supplementation, to evaluate the ability of the  
93 ER-localized Kennedy pathway to support mitochondrial function. In contrast to cytochrome *c*  
94 oxidase (complex IV), cytochrome *bc<sub>1</sub>* respiratory complex (complex III) activity was impaired in  
95 the absence of IM-synthesized PE even after supplementation with ethanolamine. Intriguingly,  
96 the positive effect of ethanolamine on complex IV activity reflected an increase in mitochondrial  
97 levels of cardiolipin (CL), and not PE. Notably, the absence of Cho1p disrupted complex III and  
98 IV activities without altering Psd1p steady state levels. These results highlight a crucial role of  
99 PE for complex III function and suggest that the IMS is the greatest obstacle preventing extra-  
100 mitochondrially produced PE from functionally substituting for IM-fabricated PE. Structures of  
101 yeast and human complex III have each revealed a bound PE in close proximity to the complex  
102 III subunit, Qcr7p<sup>30,31</sup>. Strikingly, mutations predicted to disrupt PE-binding by Qcr7p impaired  
103 complex III activity to a similar level as in the absence of Psd1p. Altogether, we demonstrate



104 that PE made in the IM by Psd1p is critical to support full complex III function and provide the  
105 first molecular evidence of the functional importance of a PE-binding site in complex III.

## 106 RESULTS

107 *The impaired respiratory growth of  $psd1\Delta$  yeast is not rescued by PE synthesis through the*  
108 *Kennedy pathway*

109 The ability of supplemental  
110 ethanolamine to rescue the respiratory  
111 growth defect of  $psd1\Delta$  yeast has  
112 been reported by some groups<sup>28</sup> but  
113 not others<sup>1,11,27</sup>. This is an important  
114 controversy to resolve. If extra-  
115 mitochondrially produced PE can  
116 replace PE normally made in the IM,  
117 then this would imply that the  
118 mitochondrial Psd1 pathway *per se*, is  
119 not necessary for mitochondrial  
120 function. By extension, it would  
121 suggest that mechanisms to move  
122 extra-mitochondrially produced PE into

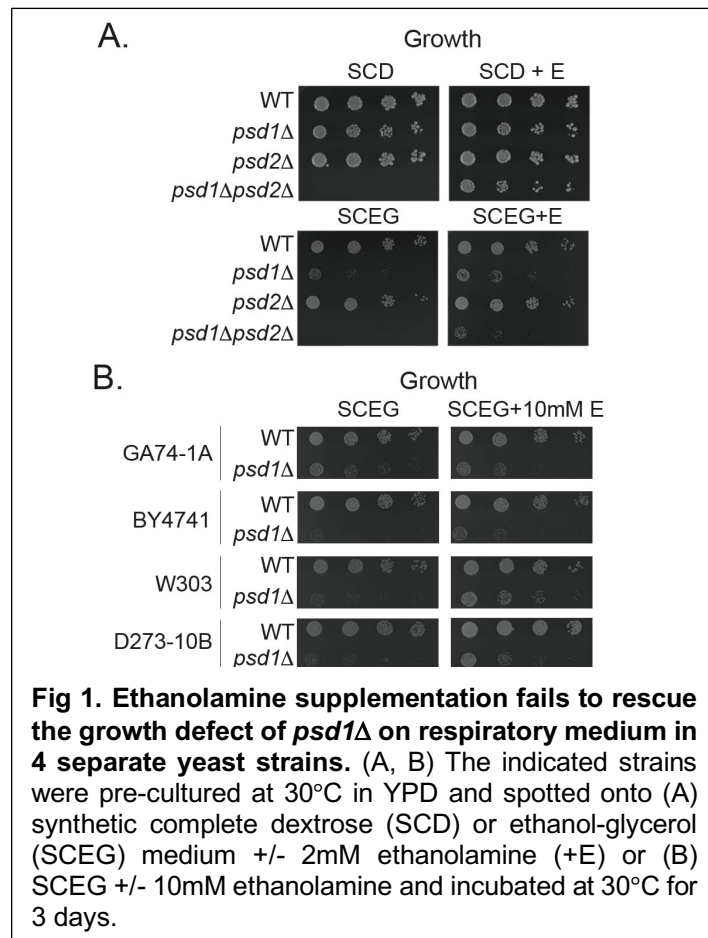

123 mitochondria are robust enough to compensate for the absence of Psd1p. Therefore, we tested  
124 the growth of wildtype (WT),  $psd1\Delta$ ,  $psd2\Delta$ , and  $psd1\Delta psd2\Delta$  in synthetic complete ethanol-  
125 glycerol (SCEG) medium with or without 2mM ethanolamine supplementation (Fig 1A).

126 Consistent with previous findings<sup>1,11,27</sup>, we found that exogenous ethanolamine  
127 supplementation restored respiratory growth of  $psd1\Delta psd2\Delta$  yeast to  $psd1\Delta$  levels but failed to  
128 fully restore the respiratory defect associated with  $psd1\Delta$  yeast. Importantly, this basic result  
129 was confirmed in  $psd1\Delta$  yeast made in three additional yeast strain backgrounds (Fig 1B, note

130 that the supplemental ethanolamine concentration was increased to 10mM), although subtle  
131 differences between the strains were noted. Overall, these findings indicate that the Kennedy  
132 pathway cannot fully compensate for the absence of Psd1p function, potentially due to  
133 inefficient trafficking of PE from the ER to mitochondrial OM and/or from the OM to the IM.

#### 134 *Validation of constructs that re-direct Psd1p to OM or ER membranes*

135 To interrogate whether the cytosol and/or the IMS is a barrier that prevents extra-  
136 mitochondrially produced PE from replacing PE normally made in the IM, we generated chimeric  
137 Psd1p constructs that are localized to either the ER or OM to redirect PS and PE metabolism.  
138 As depicted in Fig 2A, these two constructs, and the WT IM-localized Psd1p control (referred to  
139 as IM-Psd1p to distinguish it from strains expressing endogenous Psd1p), contain a C-terminal  
140 3XFLAG tag to track autocatalytic function of these chimeras by immunodetecting the released  
141 Psd1p  $\alpha$  subunit. To re-direct Psd1p to the mitochondrial OM, the mitochondrial targeting  
142 sequence and transmembrane domain of Psd1p were replaced by the equivalent domains of  
143 the single-pass OM resident protein, Tom20p. ER-Psd1p, which is directed to the secretory  
144 pathway, was generated by replacing the mitochondrial targeting sequence of Psd1p with the  
145 NH<sub>2</sub>-terminal signal sequence of carboxypeptidase Y (CPY)<sup>29,32</sup>. The ER-Psd1p construct  
146 additionally contains an *N*-glycosylation signal immediately downstream of the CPY leader  
147 sequence to track its topology. OM-Psd1p and ER-Psd1p each yielded mature  $\beta$  and  $\alpha$  subunits  
148 as detected by immunoblot of yeast cell extracts demonstrating that self-processing of Psd1p  
149 was not impaired by these modifications to its NH<sub>2</sub>-terminus (Fig 2B). All three integrated  
150 constructs were similarly expressed relative to each other and over-expressed compared to  
151 endogenous Psd1p. Importantly, both OM-Psd1p and ER-Psd1p rescued the ethanolamine  
152 auxotrophy of *psd1 $\Delta$ psd2 $\Delta$*  yeast indicating that these constructs are fully functional and  
153 capable of generating levels of PE necessary for cellular growth (Fig 2C).

154 Previously, localization of ER-Psd1p was established by virtue of its enrichment in the  
 155 40,000 x g pellet (P40) after subcellular fractionation by gravity centrifugation and its sensitivity  
 156 to endoglycosidase H, which revealed a mobility shift following SDS-PAGE post-treatment<sup>29</sup>. To  
 157 confirm the OM localization of OM-Psd1p, its protease accessibility was determined in intact  
 158 mitochondria, OM-ruptured mitoplasts, and detergent-solubilized mitochondria and compared to  
 159 IM-Psd1p. Protease treatment of intact mitochondria expressing IM-Psd1p showed that IM-  
 160 Psd1p, like the IM control Tim54p, was protected against degradation (Fig 2D). In contrast,

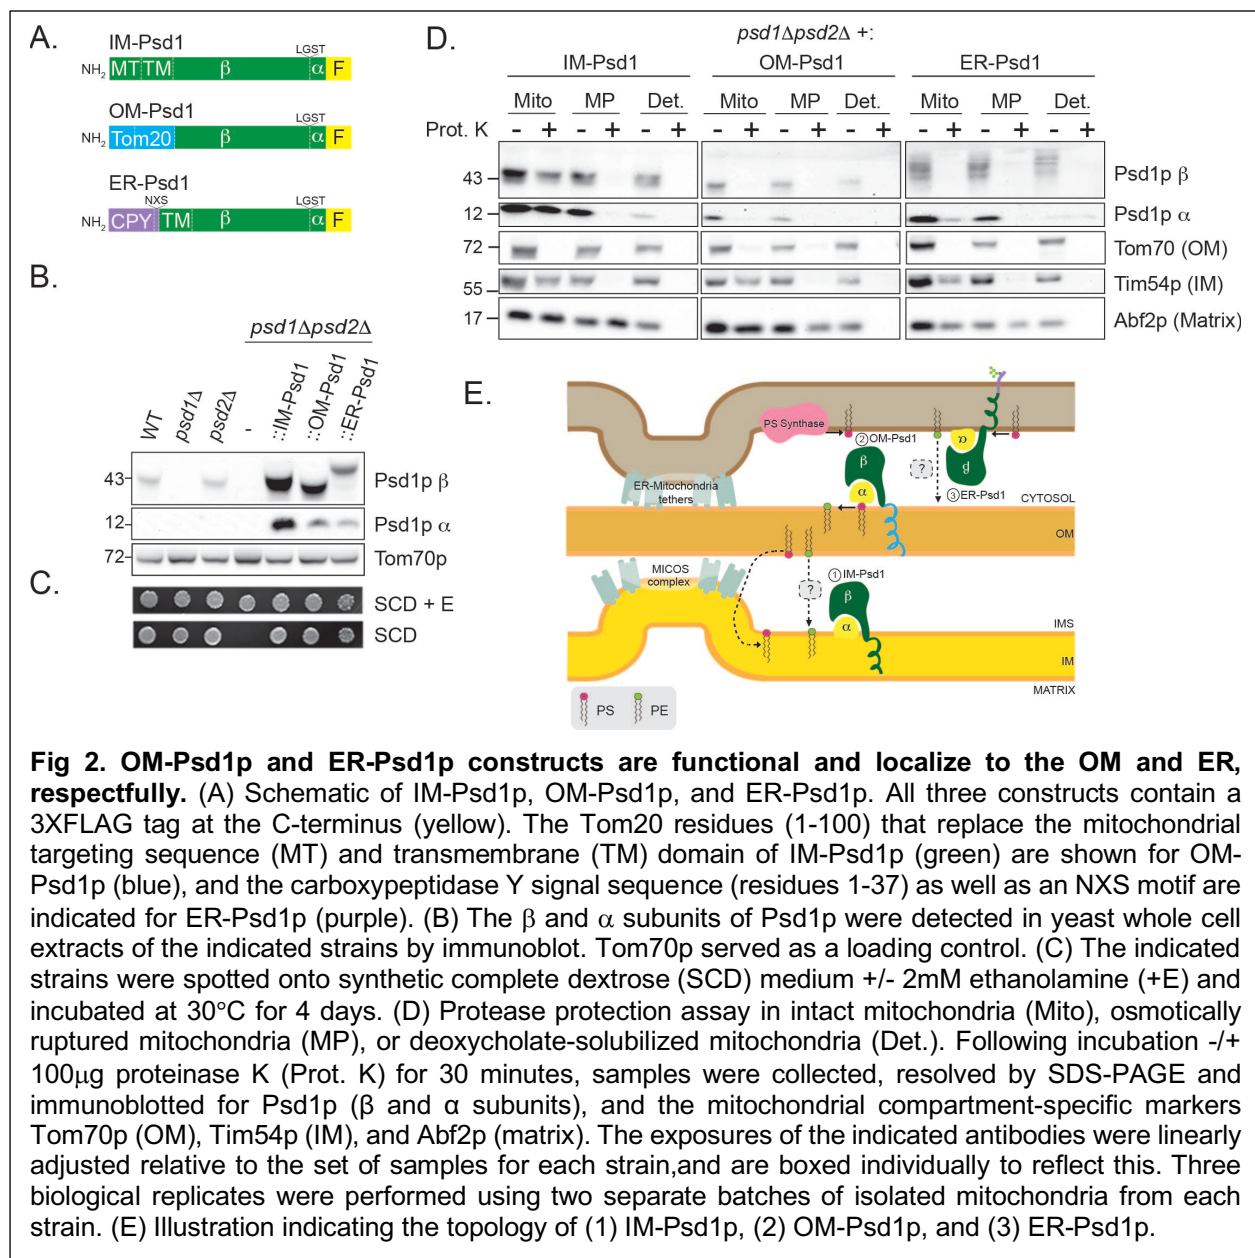

161 similar to the OM control Tom70p, OM-Psd1p was completely degraded in intact mitochondria  
162 verifying that it was successfully re-localized to the OM with the bulk of the enzyme facing the  
163 cytosol. As expected given the presence of inter-organelle contact sites, a proportion of ER-  
164 Psd1p co-fractionated with crude mitochondria (Supplementary Fig 1) and demonstrated  
165 protease-sensitivity in intact mitochondria (Fig 2D), a topology that is consistent with its N-  
166 glycosylation status (Fig 2E). Thus, a portion of ER-Psd1p is retained in the ER and/or resides  
167 in an endosomal compartment that is co-purified with mitochondria.

168 *OM-Psd1p and ER-Psd1p generate levels of PE in mitochondrial membranes that exceed WT*

169 Next, the lipid content of cellular and mitochondrial membranes was assessed in WT,  
170 *psd1Δ*, *psd2Δ*, *psd1Δpsd2Δ*, IM-Psd1, OM-Psd1 and ER-Psd1 yeast (Fig 3 and supplementary  
171 Fig 2). The absence of Psd1p resulted in reduced levels of cellular and mitochondrial PE; the  
172 combined absence of Psd1p and Psd2p resulted in an additive effect on the steady state  
173 abundance of PE (Fig 3A and 3G). In *psd1Δ* and *psd1Δpsd2Δ* membranes, the levels of  
174 phosphatidylinositol (PI) was increased (Figure 3B and 3H) and CL decreased (Fig 3C and 3I),  
175 consistent with previous reports<sup>9,28,33</sup>. A compensatory increase in PS was notably absent in  
176 these yeast strains (Fig 3D and 3J). While mitochondrial PE levels were modestly decreased in  
177 the absence of Psd2p (Fig 3G), this decrease failed to result in a respiratory growth defect (Fig  
178 1). Combined, these results indicate that Psd2p contributes to the pool of PE associated with  
179 mitochondria which is nonetheless unable to functionally replace PE made by Psd1p.

180 Interestingly, OM-Psd1 and ER-Psd1 yeast contained significantly higher relative  
181 amounts of PE than IM-Psd1 in both cellular and mitochondrial membranes (Fig 3A and 3G). As  
182 IM-Psd1p, OM-Psd1p, and ER-Psd1p are similarly over-expressed, this suggests that OM-  
183 Psd1p and ER-Psd1p, which are either present in compartments where PS is made (ER-Psd1p)  
184 or through which PS must traffic to reach IM-Psd1p (OM-Psd1p), have short-circuited normal  
185 mitochondrial PE metabolism. In support of this interpretation, the steady state levels of Cho1p  
186 (Supplementary Fig 3) and mitochondrial PS (Fig 3J) were increased by OM-Psd1p but not ER-

### Cellular Steady State Phospholipids

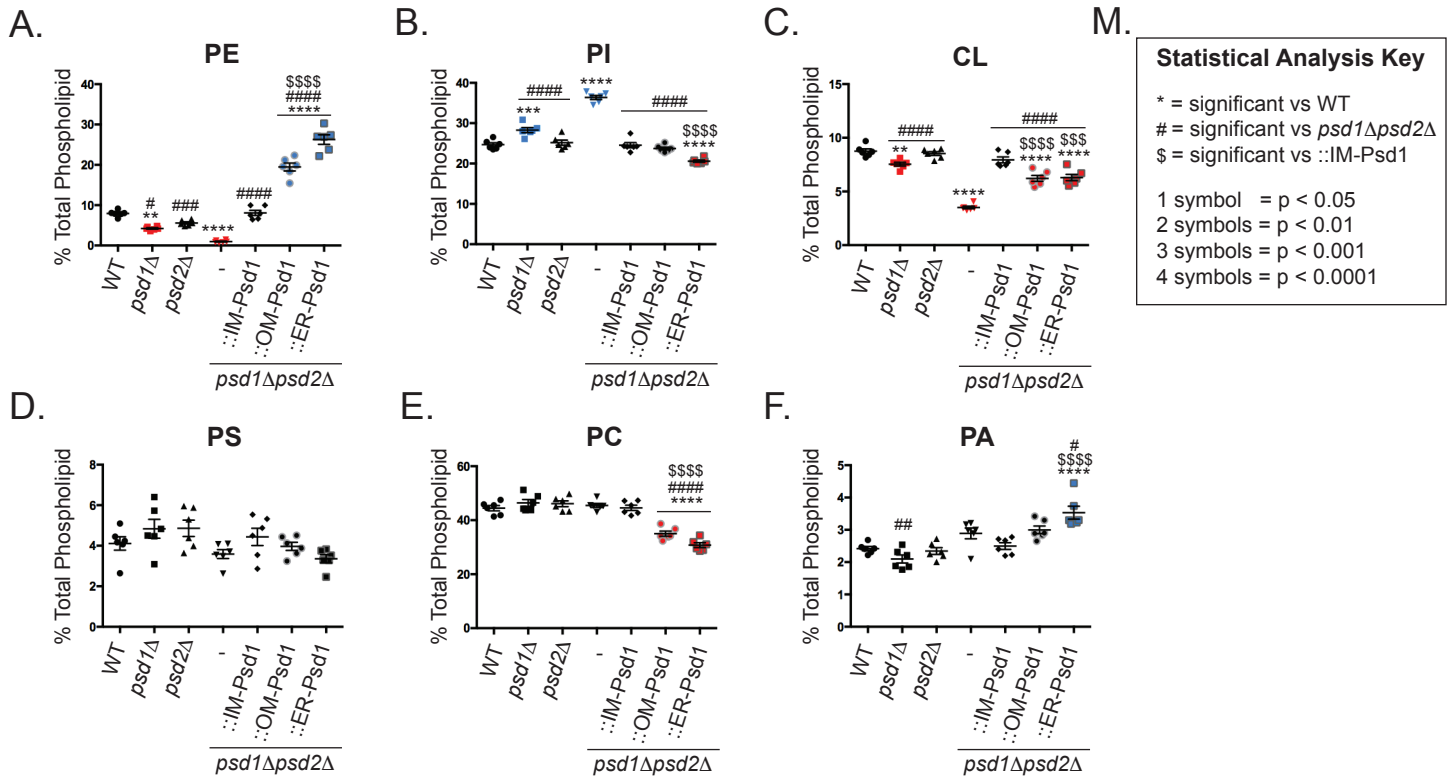

### Mitochondrial Steady State Phospholipids

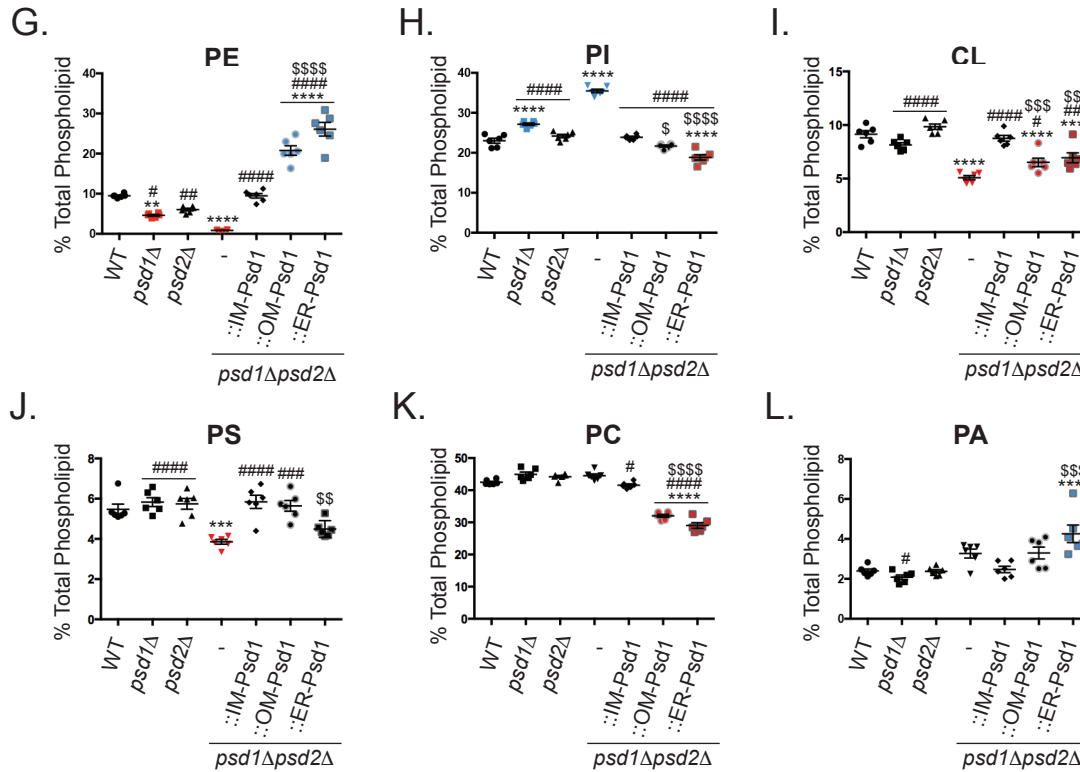

**Fig 3. OM-Psd1 and ER-Psd1 contain robust levels of PE in both cellular and mitochondrial membranes.** (A-F) Cellular and (G-L) mitochondrial phospholipids from the indicated strains were labeled overnight with  $^{32}\text{P}_i$  and separated by TLC. All graphs show the mean  $\pm$  S.E.M. for  $n=6$  biological replicates. Significant differences compared to WT were calculated by one-way ANOVA. (M) Key for symbols used for statistical analysis interpretation by one-way ANOVA when comparing samples *versus* WT (\*), *psd1Δpsd2Δ* (#), or IM-Psd1 (\$).

187 Psd1p, consistent with a mitochondrial trafficking requirement for the former, but not the latter,  
188 chimera. Of note, OM-Psd1p and ER-Psd1p both normalized the absolute amount of Cho1p and  
189 its phosphorylated pool which were significantly increased in *psd1Δpsd2Δ* yeast grown in  
190 respiratory conditions (Supplementary Fig 3A, and 3D-F). As Cho1p phosphorylation has been  
191 shown to both inhibit enzyme activity and stabilize the polypeptide<sup>34</sup>, these changes suggest  
192 that feedback mechanisms are activated by the severe PE depletion present in *psd1Δpsd2Δ*  
193 yeast. The relative abundance of phosphatidylcholine (PC) was reduced in OM-Psd1 and ER-  
194 Psd1 (Fig 3E and 3K), and although CL levels were significantly increased compared to  
195 *psd1Δpsd2Δ* mitochondria, they were still lower than in WT (Fig 3C and 3I). The reduced levels  
196 of PC in OM-Psd1 and ER-Psd1 is notable as it might have been predicted that an increased  
197 production of PE would have resulted in augmented PC synthesis by Pem1p and Pem2p,  
198 methyltransferases which reside in the ER and convert PE to PC<sup>35</sup>. Importantly, the steady  
199 state level of Kar2p, the yeast equivalent of the Hsp70 chaperone BiP<sup>36</sup>, was not increased in  
200 OM-Psd1 or ER-Psd1 (Supplementary Fig 3G), demonstrating that their altered membrane  
201 compositions did not induce ER stress. In contrast, Kar2p was significantly elevated in both  
202 *psd1Δpsd2Δ* and *cho1Δ* strains.

203 Overall, the increased levels of PE detected in OM-Psd1 and ER-Psd1 suggests that  
204 both chimeras have increased access to substrate compared to IM-Psd1. This conclusion is  
205 bolstered both by the fact that overexpressed IM-Psd1p only restored PE to WT levels (Fig 3A  
206 and 3G), as well as results from a prior study that used a plasmid-based overexpression  
207 system<sup>1</sup>. Thus, access to substrate is a major regulatory component that determines Psd1p  
208 activity.

209 A limitation of the radiolabeling-based phospholipid analysis is that it utilized crude  
210 mitochondria isolated after physical disruption of intact yeast with glass beads. As such,  
211 phospholipid analyses were additionally performed using sucrose gradient purified mitochondria  
212 derived from non-radiolabeled yeast cultures. Sucrose purification resulted in mitochondria that



213 were enriched in mitochondrial proteins compared to crude mitochondria (Supplementary Fig  
214 4A). Subsequent phospholipid analyses of the sucrose purified mitochondria provided a profile  
215 that was consistent with results derived using crude mitochondria (Fig 3), with one notable  
216 exception: the PE levels were roughly equal in OM-Psd1 and ER-Psd1 sucrose purified  
217 mitochondria (Supplementary Fig 4E). The reduced amounts of mitochondrial PE in ER-Psd1  
218 following sucrose purification likely reflects their increased purity and provides evidence that PE  
219 made in the ER can access mitochondrial membranes. Importantly, there were no dramatic  
220 differences in the mitochondrial architectures of strains with elevated or decreased PE levels  
221 (Supplementary Fig 5), consistent with previous observations in *psd1Δ* yeast<sup>28</sup>. Overall, re-  
222 routing Psd1p to either the OM or ER results in a robust increase in cellular and mitochondrial  
223 PE levels which may or may not reach the mitochondrial IM.

#### 224 *OM-Psd1 and ER-Psd1 phenocopy the respiratory defect of psd1Δ yeast*

225 We initially evaluated oxidative phosphorylation in these strains by determining their  
226 growth on synthetic mediums containing dextrose +/- 2mM ethanolamine, lactate, or ethanol-  
227 glycerol +/- 2mM ethanolamine (Fig 4A). Compared to IM-Psd1p, OM-Psd1p and ER-Psd1p  
228 only partially improved growth of *psd1Δpsd2Δ* yeast on respiratory carbon sources (lactate and  
229 ethanol-glycerol). In fact, they supported respiratory growth that was similar to (ER-Psd1p) or  
230 slightly better than (OM-Psd1p) *psd1Δ* yeast, but still significantly reduced compared to the WT  
231 strain. Interestingly, respiratory growth was slightly better for *psd1Δpsd2Δ* yeast expressing  
232 OM-Psd1p *versus* ER-Psd1p. The respiratory phenotype of OM-Psd1 and ER-Psd1 yeast  
233 suggests that PE made in either the OM or ER cannot functionally replace PE produced in the  
234 IM. Indeed, ethanolamine supplementation did not further improve the respiratory growth of  
235 either OM-Psd1 or ER-Psd1 yeast (Fig 4A).

236 To directly assess OXPHOS capacity in these strains, oxygen consumption was  
237 monitored in isolated mitochondria using an O<sub>2</sub> electrode after the addition of ADP and  
238 ascorbate tetramethyl-*p*-phenyldiamine (TMPD) which promotes proton pumping by complex IV

239 (Fig 4B-4E). To determine maximal respiratory capacity, carbonyl cyanide *m*-chlorophenyl  
 240 hydrazine (CCCP) was added after ADP was depleted and mitochondrial respiration had  
 241 returned from the ADP-stimulated (State 3) to the resting (State 4) respiratory rate. Mitochondria  
 242 lacking Psd1p, but not Psd2p, had reduced maximal uncoupled respiratory rate compared to  
 243 WT mitochondria. Even though *psd2Δ* mitochondria consumed O<sub>2</sub> like WT, the combined  
 244 absence of Psd1p and Psd2p caused a more severe respiratory defect than was observed  
 245 when only Psd1p was missing. This indicates that in the absence of Psd1p, PE made by Psd2p  
 246 has some capacity to compensate by supporting limited complex IV activity. Interestingly, the  
 247 uncoupled respiratory rate for OM-Psd1 and ER-Psd1 was significantly improved compared to  
 248 *psd1Δpsd2Δ* mitochondria but still impaired relative to IM-Psd1 (Fig 4B). The respiratory control

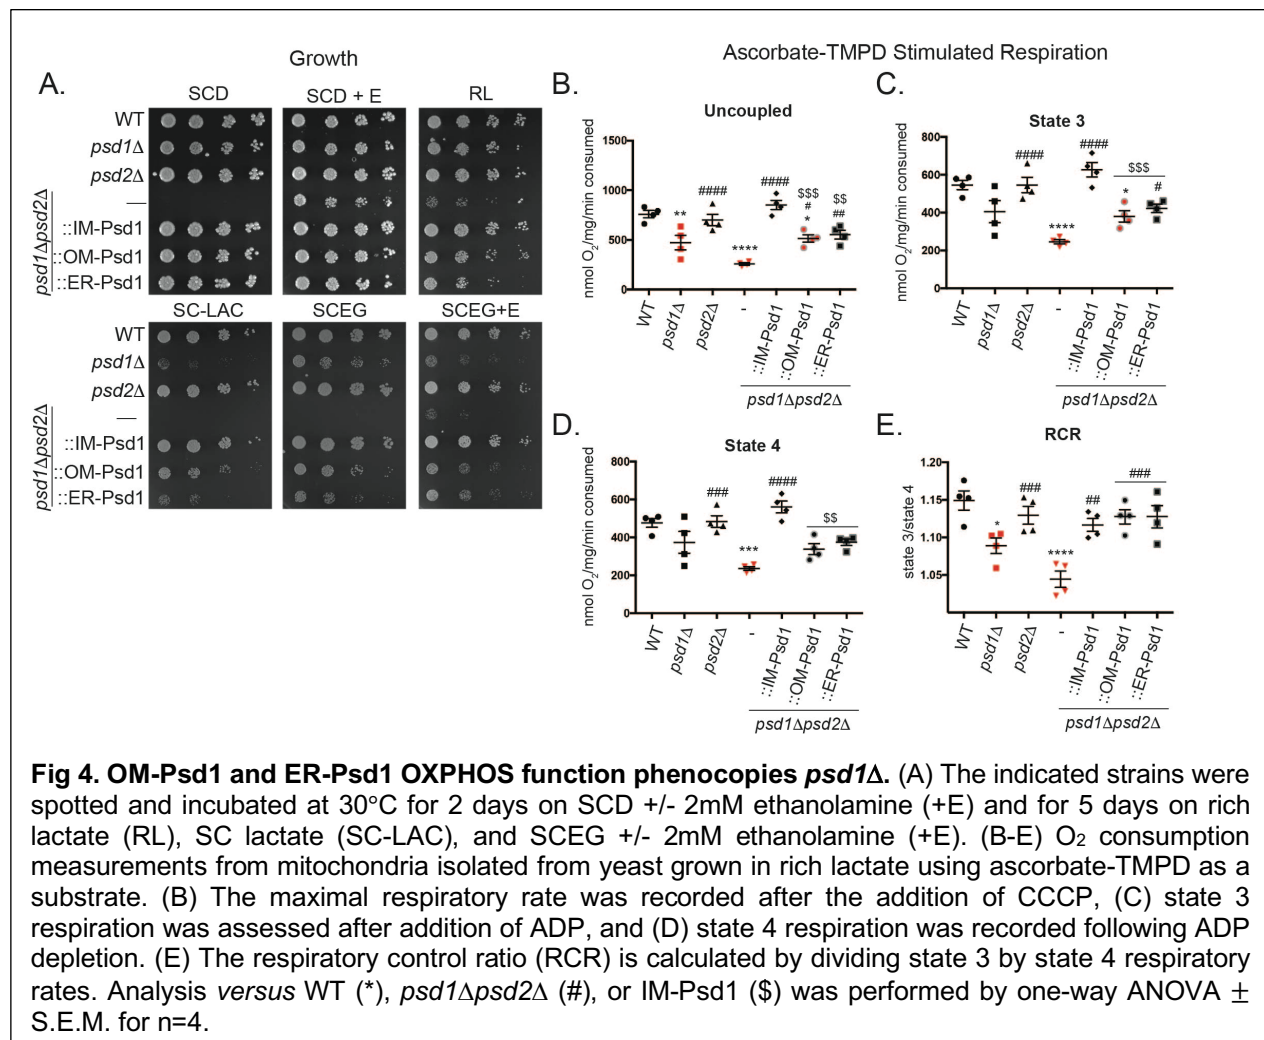



249 ratio (RCR) is an indication of how well respiration is coupled to ATP synthesis and is calculated  
250 by dividing the ADP-stimulated respiration rate by the resting respiration rate (State 3/State 4).  
251 RCR ratios were significantly decreased in *psd1Δ* and *psd1Δpsd2Δ* mitochondria but  
252 perplexingly, OM-Psd1 and ER-Psd1 displayed a ratio similar to WT and IM-Psd1 levels (Fig  
253 4C). For *psd1Δpsd2Δ* yeast expressing OM-Psd1p and ER-Psd1p, the normal RCR stems from  
254 the fact that they improved State 3 O<sub>2</sub> consumption more than State 4. Similar to Psd2p in the  
255 context of *psd1Δ* yeast, OM-Psd1p and ER-Psd1p significantly improved *psd1Δpsd2Δ*  
256 respiratory rates to roughly *psd1Δ* levels, indicating that extra-mitochondrial PE can indeed play  
257 an important role in enhancing respiration. Combined, these results suggest that defective  
258 complex IV function may contribute to the reduced respiratory growth observed when Psd1p is  
259 absent from the IM.

#### 260 *Complex IV function in psd1Δpsd2Δ mitochondria is rescued by ER-Psd1p*

261 When grown in dextrose, *psd1Δ* and *psd1Δpsd2Δ* yeast lose their mitochondrial  
262 genome, visualized by formation of petite colonies, at a high frequency<sup>1,28,37</sup>. Due to this, we  
263 harvested mitochondria from cultures grown in rich lactate to select for growth of respiratory  
264 competent cells. As expected, mitochondrial DNA (mtDNA) levels were equivalent between  
265 strains in these growth conditions (Fig 5A; ρ<sup>0</sup> yeast, which are devoid of mtDNA, served as a  
266 negative control). Next, isolated complex IV activity measurements were recorded by monitoring  
267 the rate of oxidation of reduced cytochrome *c* in mitochondria solubilized in 0.5% *n*-Dodecyl-β-  
268 D-maltoside (DDM). Complex IV activity was significantly decreased in *psd1Δ*, *psd1Δpsd2Δ* and  
269 OM-Psd1 mitochondria but surprisingly, ER-Psd1 retained WT function (Fig 5B). To determine if  
270 the different complex IV activities associated with OM-Psd1 and ER-Psd1 mitochondria  
271 reflected changes in its expression, we analyzed the steady state amounts of both nuclear and  
272 mtDNA encoded subunits of complex IV (Fig 5C). While the levels of the mtDNA-encoded  
273 subunit, Cox2p, was significantly decreased in *psd1Δpsd2Δ* and OM-Psd1 strains, the steady

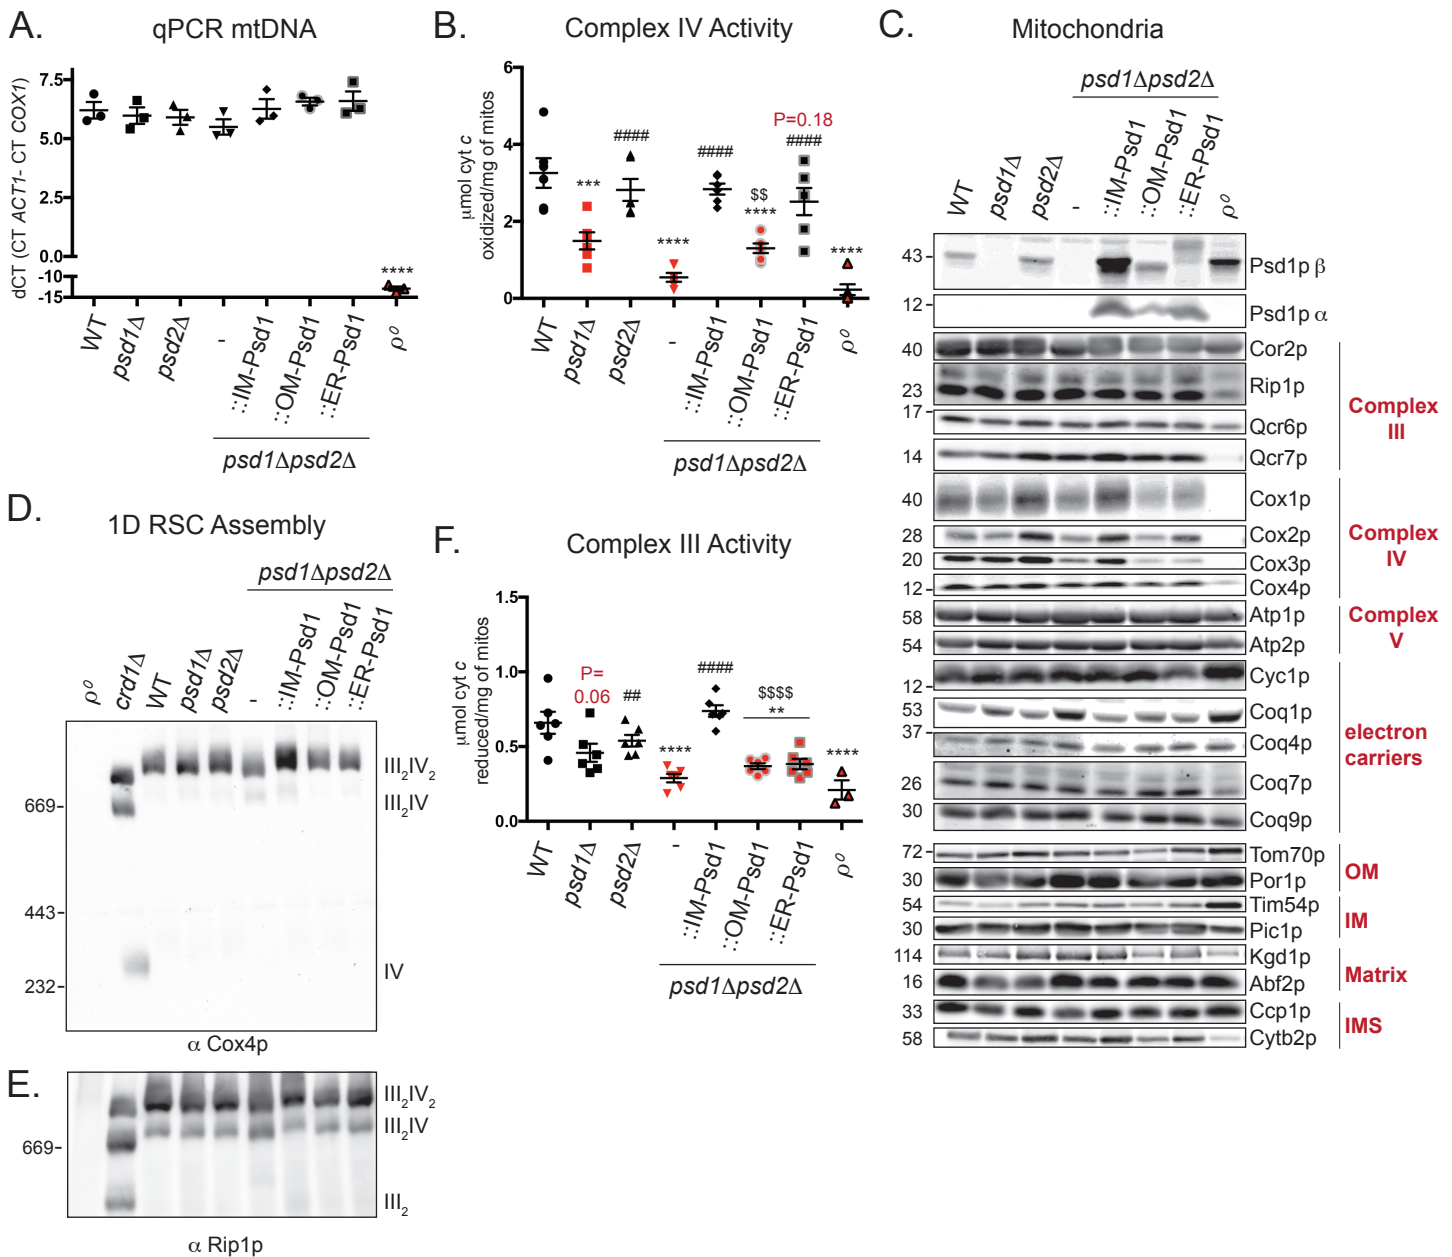

**Fig 5. Complex III and IV activities are impaired when Psd1p is absent in the IM.** (A) mtDNA was isolated from the indicated strains, normalized, and quantified by qPCR. Analysis was performed by one-way ANOVA  $\pm$  S.E.M. for  $n=3$ . (B) Spectrophotometric assay following the oxidation of cytochrome *c* at 550nm in isolated mitochondria solubilized in 0.5% (w/v) DDM. Analysis versus WT (\*), *psd1 $\Delta$ psd2 $\Delta$*  (#), or IM-Psd1 (\$) was performed by one-way ANOVA  $\pm$  S.E.M. for  $n=6$  or  $n=3$  for  $\rho^0$ . P values for decreases that didn't achieve significance are reported in red and were analyzed by student *t*-test versus WT. (C) Mitochondria from the indicated strains were immunoblotted for subunits of complex III (CIII), complex IV (CIV), complex V (CV), and the Coq synthome, cytochrome *c*, and markers of each mitochondrial compartment. (D, E) Blue native-PAGE analysis of respiratory supercomplexes (RSCs) using mitochondrial extracts solubilized in 1.5% (w/v) digitonin. (D) Complex IV assembly was monitored by immunoblot against the nuclear-encoded subunit Cox4p and (E) Complex III assembly was monitored by immunoblot against the nuclear-encoded subunit Rip1p. Mitochondria lacking CL (*crd1 $\Delta$* ) were used as a positive control for RSC destabilization<sup>53</sup>. (F) Spectrophotometric assay following the reduction of cytochrome *c* at 550nm in isolated mitochondria solubilized in 0.5% (w/v) DDM. Analysis versus WT (\*), *psd1 $\Delta$ psd2 $\Delta$*  (#), or IM-Psd1 (\$) was performed by one-way ANOVA  $\pm$  S.E.M for  $n=6$  or  $n=3$  for  $\rho^0$ . P values for decreases that didn't achieve significance are reported in red and were analyzed by student *t*-test versus WT.

274 state abundance of the two additional mtDNA-encoded subunits, Cox1p and Cox3p, were not  
275 significantly changed and the amount of a constituent encoded in the nucleus, Cox4p, was  
276 decreased in OM-Psd1 but not *psd1Δpsd2Δ* (Supplementary Fig 6). Further, blue native-PAGE  
277 analyses indicated that complex IV assembly into respiratory supercomplexes that consist of a  
278 complex III dimer affiliated with either one or two complex IV monomers<sup>38</sup>, was normal  
279 regardless of the absence of *PSD1* or *PSD2*, singly or in combination, as reported by others<sup>28</sup>,  
280 or whether Psd1p was expressed in the IM, OM, or ER (Fig 5D).

### 281 *Cytochrome bc<sub>1</sub> complex function is impaired when Psd1p is absent from the IM*

282 The ability of ER-Psd1p, but not OM-Psd1p, to rescue complex IV activity to WT levels  
283 was surprising given that neither chimeric construct restored respiratory growth of the  
284 *psd1Δpsd2Δ* strain to this degree (Fig 4A). Therefore, we postulated that the incomplete  
285 respiratory growth rescue of OM-Psd1 and ER-Psd1 could reflect a defect at the level of  
286 complex III. Indeed, complex III activity was reduced in *psd1Δ* and significantly decreased in  
287 *psd1Δpsd2Δ* mitochondrial extracts (Fig 5F). While ER-Psd1p significantly improved complex IV  
288 function over that detected in *psd1Δpsd2Δ* mitochondria, neither ER-Psd1p or OM-Psd1p  
289 supported complex III activity that resembled WT. The reduced complex III activity in *psd1Δ*,  
290 *psd1Δpsd2Δ*, and *psd1Δpsd2Δ* expressing OM-Psd1p or ER-Psd1p did not reflect alterations in  
291 the steady state abundance of its subunits (Fig 5C, Cor2p, Rip1p, Qcr6p, and Qcr7p, quantified  
292 in Supplementary Fig 6) or its assembly into supercomplexes (Fig 5E) although there was  
293 proportionately more of the smaller supercomplex (III<sub>2</sub>IV > III<sub>2</sub>IV<sub>2</sub>) detected in *psd1Δpsd2Δ*  
294 mitochondrial extracts. Furthermore, the steady state levels of the complex III electron acceptor  
295 cytochrome *c* were normal (Fig 5C and Supplementary Fig 6M). Similarly, subunits of the  
296 coenzyme Q (CoQ) synthome, a macromolecular complex that catalyzes the synthesis of the  
297 complex III electron donor CoQ<sup>39</sup>, were equal with one exception (Fig 5C and Supplementary  
298 Fig 7A). In *psd1Δpsd2Δ* mitochondria, Coq1p was increased which could represent an attempt  
299 to diminish membrane stress as observed in bacteria<sup>40</sup>. Moreover, CoQ<sub>6</sub> supplementation,

300 which is capable of rescuing strains with reduced CoQ biosynthesis<sup>39</sup>, failed to improve  
301 respiratory growth of *psd1Δ* or *psd1Δpsd2Δ* yeast (Supplementary Fig 8). Lastly, *psd1Δ*,  
302 *psd1Δpsd2Δ*, OM-Psd1, and ER-Psd1 respiratory growth was not further impaired in medium  
303 lacking *para*-amino benzoic acid (Supplementary Fig 9), a molecule that can be used to produce  
304 CoQ by a secondary pathway<sup>41</sup>. In total, our results demonstrate that CoQ is not limiting for  
305 respiratory function in any of these strains. As such, they favor the hypothesis that the impaired  
306 complex III activity of *psd1Δ*, *psd1Δpsd2Δ*, OM-Psd1, and ER-Psd1 is intrinsic to the multi-  
307 subunit holoenzyme itself.

#### 308 *PE made by the Kennedy pathway rescues complex IV but not complex III function*

309 As ER-Psd1p restores complex IV, but not complex III, function, we isolated  
310 *psd1Δpsd2Δ* mitochondria from cultures grown in rich lactate, rich lactate + 2mM choline, and  
311 rich lactate +2mM ethanolamine, to evaluate the potential impact of PC and PE generation by  
312 the Kennedy pathways on complex IV activity (Fig 6A-B). Similar to ER-Psd1, supplementation  
313 of *psd1Δpsd2Δ* with ethanolamine, but not choline, restored complex IV (Fig 6A), but not  
314 complex III (Fig 6B), function to WT levels. Combined, our results indicate that PE, but not PC,  
315 made in the ER by the Kennedy pathway (Fig 6A) or in the endosomal system by either Psd2p  
316 or ER-Psd1p (Fig 5B), can significantly rescue the severe complex IV dysfunction that occurs in  
317 *psd1Δpsd2Δ* yeast. Surprisingly, when we evaluated the phospholipid composition of  
318 *psd1Δpsd2Δ* yeast supplemented with choline or ethanolamine, we found that the inclusion of  
319 ethanolamine did not alter mitochondrial PE levels (Fig 6C-D) and only modestly and yet  
320 significantly increased cellular PE abundance (Fig 6E-F), consistent with the slight increases  
321 observed in<sup>1,33</sup> but not<sup>28</sup>. Intriguingly, ethanolamine, but not choline, supplementation  
322 significantly increased CL in *psd1Δpsd2Δ* yeast to *psd1Δ* levels (Fig 6C and 6G). Significant

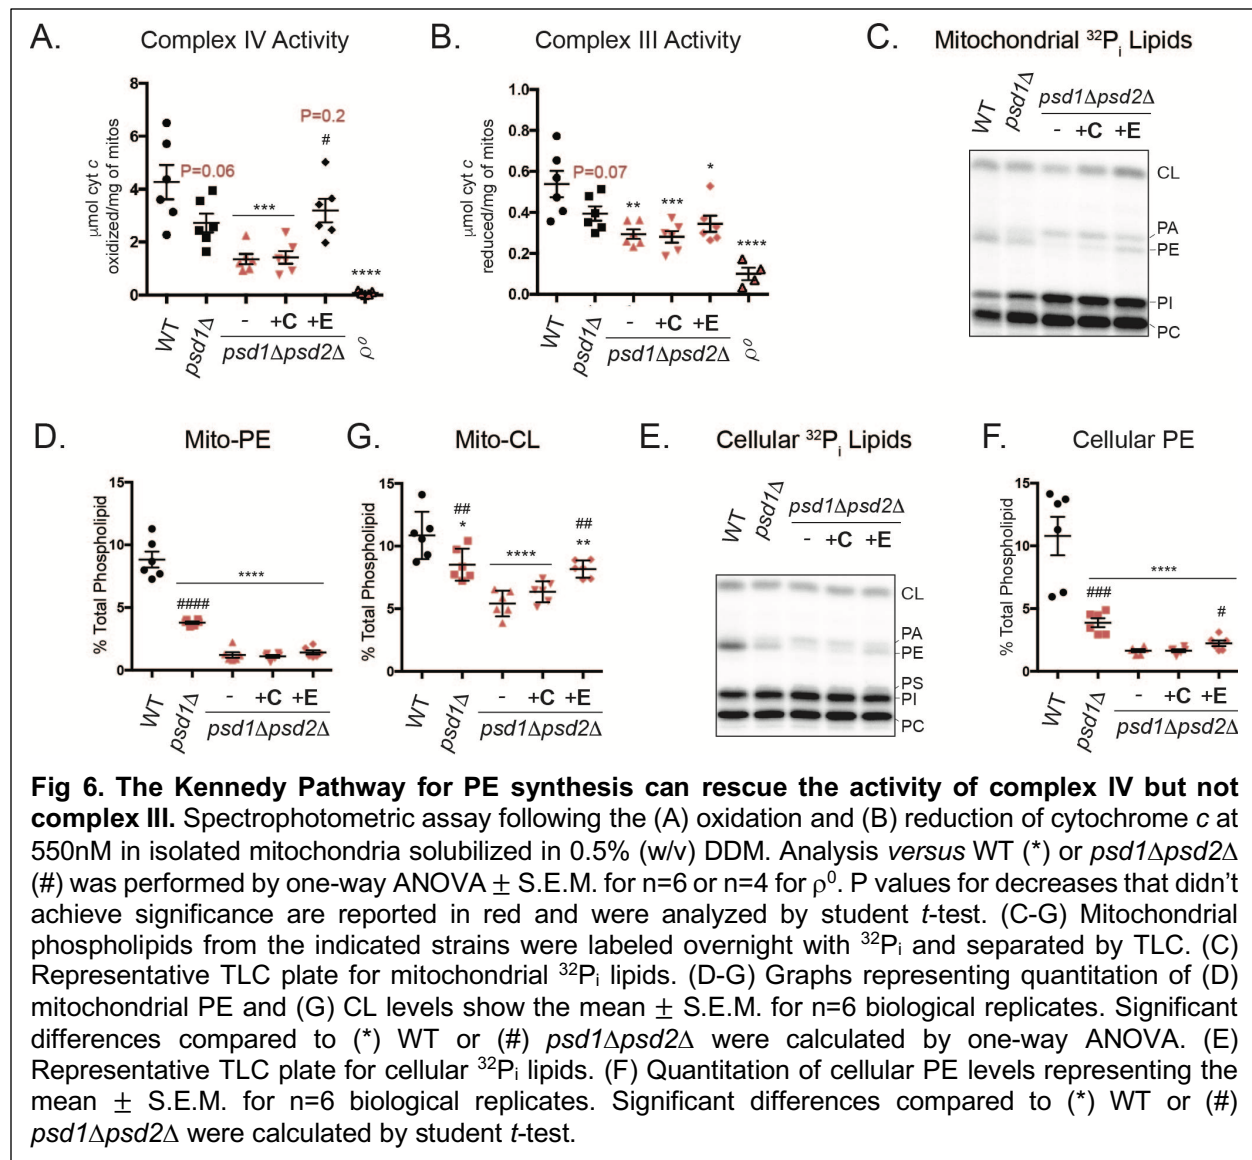

323 changes in the abundance of other phospholipid species in  $\rho\text{sd}1\Delta\text{psd}2\Delta$  yeast supplemented  
 324 with either choline or ethanolamine were not observed (Supplementary Fig 10). As such, these  
 325 results indicate that the Kennedy Pathway for PE but not PC production, is metabolically-linked  
 326 to CL biosynthesis and/or stability. Moreover, these results suggest that the ability of  
 327 ethanolamine to improve complex IV activity in  $\rho\text{sd}1\Delta\text{psd}2\Delta$  yeast is due to its unanticipated  
 328 capacity to increase CL levels, a phospholipid known to be important for complex IV function<sup>42</sup>.  
 329 These findings further underscore that PE made within the IM is necessary for the full activity of



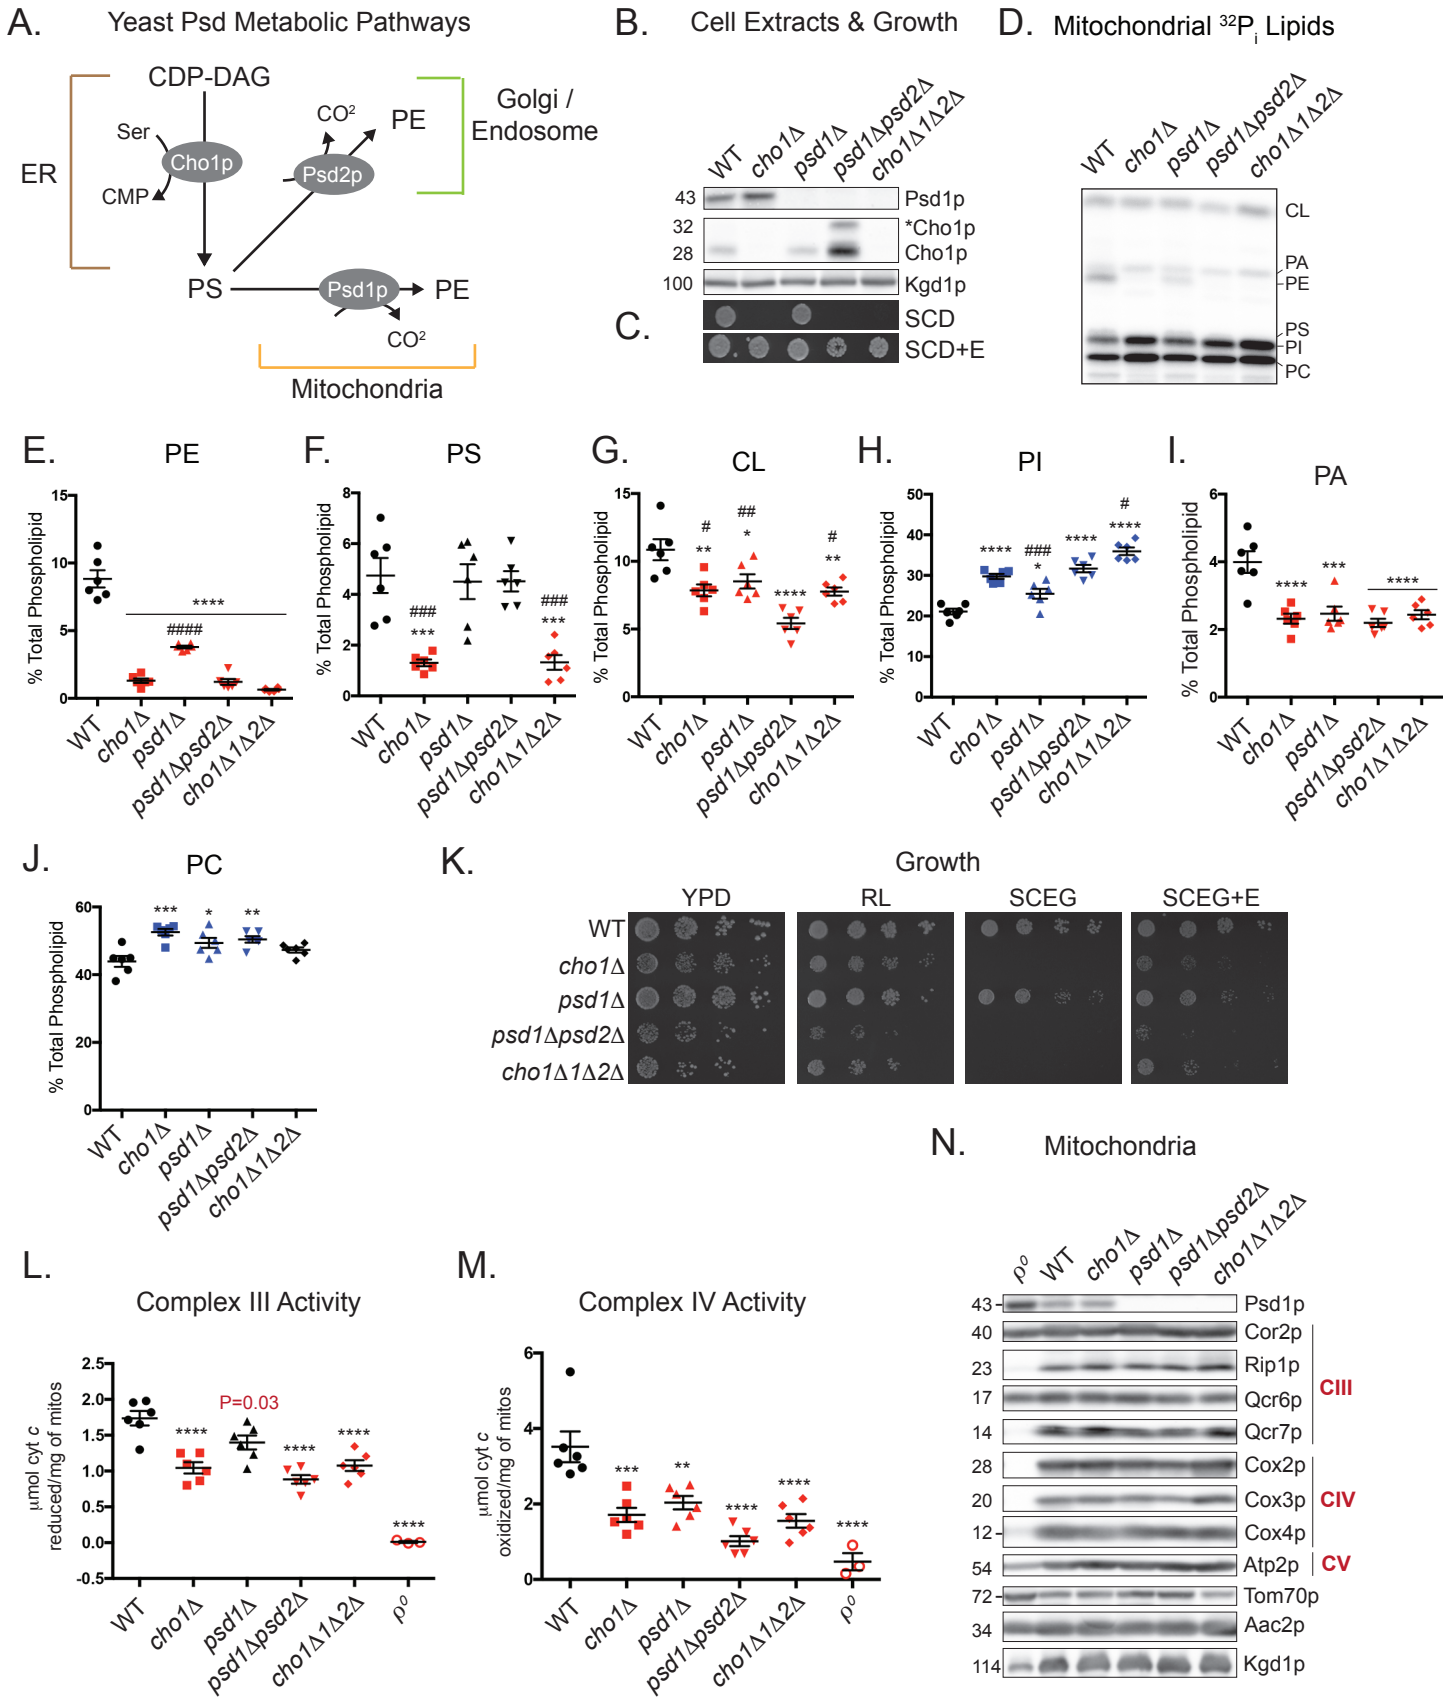

Fig 7

**Fig 7. Depletion of PE through deletion of Cho1p impairs complex III and complex IV activities.**

(A) Metabolic pathways tied to PS synthesis by Cho1p in yeast. (B) Detection of the  $\beta$  subunit of Psd1p and Cho1p expression were verified in yeast whole cell extracts of the indicated strains by immunoblot. Kgd1p served as a loading control. \*Cho1p, phosphorylated Cho1p. (C) The indicated strains were spotted onto synthetic complete dextrose (SCD) medium +/- 2mM ethanolamine (+E) and incubated at 30°C for 2 days. (D-J) Mitochondrial phospholipids from the indicated strains were labeled overnight with  $^{32}\text{P}_i$ , separated by TLC, and quantitated by phosphoimaging. All graphs show the mean  $\pm$  S.E.M. for n=6 biological replicates. Significant differences compared to (\*) WT or (#) *psd1 $\Delta$ psd2 $\Delta$*  were calculated by one-way ANOVA. (K) The indicated strains were spotted and incubated at 30°C for 2 days on YPD and for 3 days on rich lactate (RL), and SCEG +/- 2mM ethanolamine (+E). (L,M) Spectrophotometric assay following the (L) reduction and (M) oxidation of cytochrome *c* at 550nm in isolated mitochondria solubilized in 0.5% (w/v) DDM. Analysis versus WT by one-way ANOVA  $\pm$  S.E.M. for n=6 or n=3 for  $\rho^0$ . (N) Steady state expression of mitochondrial proteins in mitochondria isolated from the indicated strains.

330 complex III which is otherwise normally expressed, fully assembled, and not limited by the

331 amount of either of its mobile electron carriers.

332 *Non-enzymatic functions of Psd1p independent of PE biosynthesis are not required for complex*

333 *III activity*

334 Cho1p mediates the production of PS in the MAM of the ER through conjugation of free  
335 serine with CDP-DAG<sup>18</sup>. In yeast, this feeds into both the Psd1p and Psd2p PS decarboxylation  
336 pathways (Fig 7A). We generated deletion strains of Cho1p in the WT and *psd1 $\Delta$ psd2 $\Delta$*  (labeled  
337 *cho1 $\Delta$ 1 $\Delta$ 2 $\Delta$*  in Fig 7) genetic backgrounds as a way to deplete mitochondrial PS/PE levels while  
338 preserving Psd1p expression. Consistent with previous data, deletion of Cho1p did not affect  
339 Psd1p accumulation or maturation<sup>29</sup> (Fig 7B) and resulted in an ethanolamine auxotrophy<sup>43</sup>  
340 (Fig 7C). As anticipated, PS and PE levels were drastically reduced in strains lacking Cho1p  
341 (Fig 7D-F). In comparison to *psd1 $\Delta$ psd2 $\Delta$* , *cho1 $\Delta$ psd1 $\Delta$ psd2 $\Delta$*  yeast had a significant increase  
342 in CL and PI levels (Fig 7G and 7H), the former of which may be associated with its enhanced  
343 respiratory growth (Fig 7K). Deletion of *cho1 $\Delta$*  in the *psd1 $\Delta$ psd2 $\Delta$*  background restored PC to  
344 WT levels (Fig 7J) but failed to increase the levels of the CL precursor PA (Fig 7I). Growth of  
345 *cho1 $\Delta$*  was decreased compared to WT in YPD and rich lactate medium and similar to  
346 *psd1 $\Delta$ psd2 $\Delta$*  in SCEG supplemented with ethanolamine (Fig 7K). Notably, the activities of  
347 complex III (Fig 7L) and IV (Fig 7M) were reduced in the absence of Cho1p. Since Psd1p and  
348 essential subunits of complexes III and IV were expressed normally in the absence of Cho1p,

349 singly or in combination with Psd1p and Psd2p (Fig 7N), our combined results directly implicate  
350 mitochondrial PE depletion as the cause for the reduced respiratory function of *psd1Δ*,  
351 *psd1Δpsd2Δ*, and *cho1Δ* yeast.

352 *Glu82* of *Qcr7p* may coordinate the headgroup of a functionally important PE molecule  
353 associated with complex III

354 PE was identified in crystal structures of the yeast and mammalian cytochrome *bc<sub>1</sub>*  
355 complex in association with the essential mtDNA-encoded catalytic subunit cytochrome *b*  
356 (Cob1p) as well as the nuclear-encoded subunit Qcr7p<sup>30,31</sup>. Qcr7p is associated with the matrix-  
357 facing surface of Cob1p and it is postulated that hydrogen bonding interactions between the  
358 headgroup of PE and Glu82 of Qcr7p may help position the complex vertically within the bilayer  
359 (Fig 8A). To test the importance of this residue in forming hydrogen bonds with the amine group  
360 of PE, we introduced a charge reversal at this position by mutating Glu82 to Arg and also  
361 created a strain expressing Asp82 to test the potential effect of shortening the distance of this  
362 interaction. Importantly, the amount of Qcr7p<sup>E82R</sup> or Qcr7p<sup>E82D</sup> detected in cell and mitochondrial  
363 lysates (Fig 8B and 8C) was similar to WT indicating that neither mutation compromised Qcr7p  
364 stability (the Qcr7p<sup>E82R</sup> variant was consistently upshifted compared to WT following SDS-  
365 PAGE). Further, Qcr7p<sup>E82R</sup> and Qcr7p<sup>E82D</sup> supported respiratory growth in rich or minimal  
366 medium (Fig 8D). Despite being sufficiently functional to promote respiratory growth, complex III  
367 activity was significantly decreased for Qcr7p<sup>E82R</sup> and Qcr7p<sup>E82D</sup> to a similar degree as when  
368 Psd1p is missing (Fig 8E). Surprisingly, complex IV activity was also decreased in Qcr7p<sup>E82R</sup> but  
369 not Qcr7p<sup>E82D</sup> (Fig 8F). The impaired respiratory complex activity for Qcr7p<sup>E82R</sup> and Qcr7p<sup>E82D</sup>  
370 was independent of any changes in the steady state amount of their subunits, (Fig 8C). These  
371 results provide the first molecular evidence of the functional importance of a conserved PE-  
372 binding site identified in the structures of yeast and human complex III. Collectively, these data  
373 demonstrate that PE made in the IM by Psd1p is critical to support the intrinsic functionality of  
374 complex III and establish one likely mechanism.



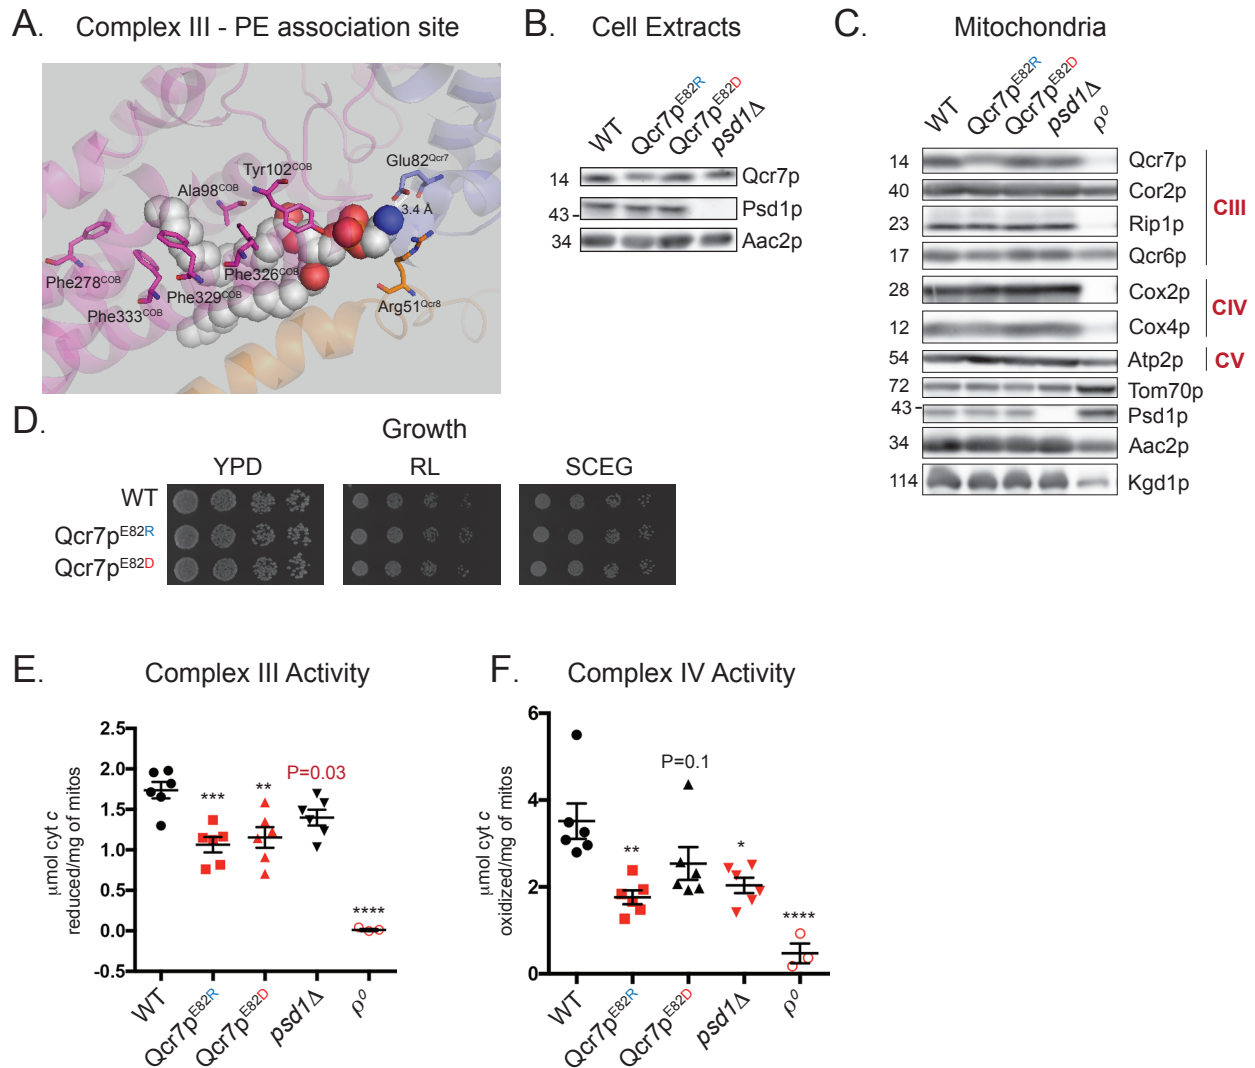

**Fig 8. A PE-coordinating residue in Qcr7p is important for complex III activity.** (A) The crystal structure of yeast cytochrome  $bc_1$  that modeled associated lipids was downloaded using PDB ID: 1KB9. Using PyMOL, the region containing of the catalytic subunit Cob1p (magenta) near the matrix facing surface was enlarged to demonstrate hydrophobic interactions between this subunit and the acyl chains of PE. Arg51 of Qcr8p (orange) also shows hydrophobic interactions with a carbon atom from the ethanolamine headgroup. Glu82 of Qcr7p (blue) was predicted to form a hydrogen bonding interaction (3.4 Å distance) with the amine group of PE, whose atoms are depicted as spheres *gray*: carbon, *red*: oxygen, and *blue*: nitrogen (hydrogen atoms are not represented). (B) WT and mutant Qcr7p was detected in yeast whole cell extracts on the indicated strains by immunoblot; Aac2p serves as a loading control. (C) Mitochondria from the indicated strains were immunoblotted for subunits of complex III and complex IV as well as markers for the indicated mitochondrial compartments. (D) The indicated strains were spotted and incubated at 30°C for 2 days on YPD and for 3 days on rich lactate (RL) and SCEG. (E, F) Spectrophotometric assay following the (E) reduction or (F) oxidation of cytochrome *c* at 550nm in isolated mitochondria solubilized in 0.5% (w/v) DDM. Analysis *versus* WT (\*) was performed by one-way ANOVA  $\pm$  S.E.M. for  $n=6$  or  $n=3$  for  $\rho^0$ . P values for decreases that didn't achieve significance are reported and were evaluated by student t-test *versus* WT.

375 **DISCUSSION**

376 PE levels have been shown to be altered in models of the neurodegenerative disorders  
377 Parkinson's disease<sup>44</sup> and Alzheimer's disease<sup>45</sup>, and recent evidence has implicated the  
378 turnover of mammalian Pisd as an important regulatory mechanism that diminishes the  
379 proliferation of breast cancer cells<sup>46</sup>. Thus, regulation of the Psd pathway is not only important  
380 for mitochondrial function but also organismal health and physiology.

381 Using an assortment of biochemical assays that measure both the combined and  
382 individual activities of the respiratory chain complexes, we sought to clarify the respiratory  
383 defect associated with *psd1Δ* yeast and whether or not PE made by the Kennedy pathway could  
384 rescue it. Two different groups using the same yeast strain background have reported that  
385 supplemental ethanolamine rescues<sup>28</sup> or fails to rescue<sup>11</sup> respiratory function of *psd1Δ* yeast.  
386 Given these conflicting results, we first tested the ability of ethanolamine supplementation to  
387 improve the respiratory growth phenotype of yeast lacking Psd1p. While we observed that  
388 growth of *psd1Δpsd2Δ* could be rescued on respiratory medium supplemented with  
389 ethanolamine, growth after 3 days was delayed and impaired similarly to *psd1Δ* yeast.  
390 Perplexingly, supplementation of *psd1Δpsd2Δ* with ethanolamine to generate PE through the  
391 Kennedy pathway did not significantly increase mitochondrial PE levels and instead resulted in  
392 a significant, albeit modest, increase in CL (Fig 6C-F), which nonetheless failed to completely  
393 restore respiratory growth. Importantly, the inability of ethanolamine to fully restore *psd1Δ*  
394 respiratory growth was verified in four distinct yeast strain backgrounds suggesting that genetic  
395 differences are not the source for the disparate results reported previously<sup>1,11,27,28</sup>. This notion is  
396 further supported by the fact that two groups that each utilized *psd1Δ* derived from the same  
397 parental strain came to opposite conclusions regarding the rescuing capacity of PE made by the  
398 Kennedy pathway<sup>11,28</sup>.

399 Interestingly, lyso-PE supplementation (PE containing only one acyl chain) can rescue  
400 *psd1*Δ respiratory growth but acts via a separate pathway than the Kennedy pathway<sup>27</sup>.  
401 Further, lyso-PE has also been demonstrated to reverse the mitochondrial defects associated  
402 with RNAi silencing of mammalian *Pisd* in cell culture<sup>10</sup>, and can increase the proliferation rate  
403 of the MCF7-RAS breast cancer cell line when *Pisd* levels are depleted<sup>46</sup>. Thus, the different  
404 ER-resident PE producing pathways appear to differ with respect to their ability to compensate  
405 for the absence of the mitochondrial *Psd* pathway suggesting that pathway-specific  
406 mitochondrial import mechanisms for PE may exist.

407 Our oxidative phosphorylation analyses demonstrated that both OM-*Psd1* and ER-*Psd1*  
408 phenocopy the respiratory defect of *psd1*Δ mitochondria. This implies that the IMS is the  
409 greatest barrier preventing PE import into the inner membrane. Moreover, we have identified a  
410 key oxidative phosphorylation component that is uniquely dependent on PE made by *Psd1p* in  
411 the IM: respiratory complex III. Specifically, we demonstrated that while PE synthesized in the  
412 endosomal system—by ER-*Psd1p*, *Psd2p*, or the Kennedy pathway— can rescue the impaired  
413 complex IV activity that occurs in the absence of *Psd1p* in the IM, it fails to do so for complex III  
414 (Fig 5F and Fig 6B). Since complex III was impaired in yeast deficient in mitochondrial PS and  
415 PE that contained a normal amount of fully processed *Psd1p* (*cho1*Δ, Fig 7K), our results  
416 demonstrate that the complex III functional defect results from an insufficient supply of PE and  
417 not from a non-PE related activity of *Psd1p*.

418 What is the basis for the capacity of extra-mitochondrially produced PE to rescue  
419 complex IV but not complex III function? As both complex III and complex IV are IM residents,  
420 one possibility is that these respiratory complexes require different levels of PE within the inner  
421 membrane to function appropriately. If true, this would imply that the relative levels of PE in the  
422 IM in the strains analyzed are equivalent between WT, *psd2*Δ, and IM-*Psd1*, similarly depleted  
423 in ER-*Psd1* and *psd1*Δ, less than *psd1*Δ in OM-*Psd1*, and almost completely absent in

424 *psd1Δpsd2Δ*. Unfortunately, while it is clear that OM-Psd1 and ER-Psd1 mitochondria contain  
425 robust levels of PE, we have yet to determine its steady state distribution between the outer and  
426 inner membranes. Another possible explanation for the different dependence of complex III and  
427 IV function on IM-produced PE could reflect the nature of the PE made in the mitochondrion  
428 versus elsewhere. Evidence that polyunsaturated 38:4 and 38:5 PE species are enriched in the  
429 mitochondrial inner membrane of HeLa cells has been previously reported<sup>47</sup>. While both the  
430 Kennedy and Psd pathways have the capacity to produce all diacyl-PE species, the Kennedy  
431 pathway preferentially synthesizes mono 34:2 or di-unsaturated 36:3 PE and Psd mainly  
432 generates polyunsaturated 38:4 or 38:5 PE<sup>48</sup>. However, *S. cerevisiae* is unable to synthesize  
433 complex unsaturated fatty acids and the PE acyl chain pattern is the same between whole cells  
434 and isolated mitochondria<sup>49,50</sup>. It is interesting to note that, even though the Kennedy and Psd  
435 pathways both share a preference for generating both mono- and di-unsaturated PE in yeast,  
436 there is a 10% enrichment of 34:2 PE that contains oleic and palmitoleic acid in crude  
437 mitochondria versus ER-derived microsomes<sup>49</sup>. Another intriguing possibility is that the  
438 synthesis of PE by Psd1p in the IM is somehow directly coupled to the incorporation of this lipid  
439 into partially or fully assembled complex III. Recently, a subunit of complex IV was found to  
440 associate with the MICOS subunit, Mic19, in mammalian cells by EM tomography and  
441 immunoprecipitation<sup>51</sup>. As the MICOS complex was suggested to work in concert with Ups2p to  
442 regulate mitochondrial PS/PE metabolism in yeast<sup>26</sup>, contact sites between the OM and IM  
443 could potentially facilitate the transport of ER-derived PE to complex IV more directly than it can  
444 to complex III.

445 Intriguingly, the improved complex IV functionality provided by ethanolamine correlated  
446 best with an increased abundance of CL and not PE (Fig 6C-F), a phenomenon that has been  
447 observed previously<sup>1,28</sup>, suggesting that this rescue is actually CL-dependent. The importance  
448 of CL in the assembly and function of the respiratory complexes and supercomplexes is well  
449 documented<sup>42,52,53</sup>. Our results strongly indicate that when Psd1p is missing or mis-localized, a

450 minimal threshold of PE is not achieved within the IM that is necessary to accumulate normal  
451 levels of CL and promote the full activity of the OXPHOS machinery. Although it is presently  
452 unclear how the Kennedy Pathway for PE production promotes CL accumulation, it is known  
453 that the Ups1p and Ups2p lipid trafficking proteins have an inverse relationship with respect to  
454 CL/PE metabolism suggesting that this may be linked to PS/PA trafficking into the IM <sup>3,54,55</sup>.  
455 Depletion of PS in the *psd1Δpsd2Δ* background restored CL levels to that of *psd1Δ* and *cho1Δ*  
456 which were still comparatively reduced vs WT (Fig 7G). This increase in CL also coincided with  
457 improved growth for *cho1Δpsd1Δpsd2Δ* yeast (Fig 7K). It is possible that in the absence of PS,  
458 metabolic pathways that either promote PA formation in the ER <sup>56</sup> or promote PA import to the  
459 IM <sup>57,58</sup> are stimulated. Moving forward, it will be important to distinguish between these non-  
460 mutually exclusive models.

461 Another outstanding question raised by our study is exactly how PE made by Psd1p in  
462 the IM promotes complex III function. Since *psd1Δpsd2Δ* yeast contain normal amounts of  
463 cytochrome *c* and CoQ<sub>6</sub> is not limiting, the underlying respiratory defect is intrinsic to complex  
464 III. We demonstrated that mutations in a residue of Qcr7p predicted to bind PE impaired  
465 complex III activity (Fig 8E) establishing a likely mechanistic basis for the requirement of PE for  
466 its function. To our knowledge, this is the first molecular evidence demonstrating the functional  
467 importance of a specific interaction of PE with complex III, which until now had only been  
468 postulated from crystal structures of yeast complex III and human respiratory supercomplexes  
469 <sup>30,31</sup>. A second PE is found adjacent to the dimer interface of this complex; as such, the acyl  
470 chains of PE are thought to interact with both monomers and assist in dimer formation.  
471 Additionally, the acyl chains of PE at the dimer interface could potentially promote quinol-  
472 quinone exchange at the Q<sub>i</sub> and Q<sub>0</sub> sites. More broadly, during quinol-quinone exchange,  
473 sidechain movement of Cob1p is thought to be necessary to transfer protons from His202 to  
474 ubiquinone, and perhaps depletion of PE hinders this movement and delays proton flux <sup>59</sup>.

475 Further, electron-transfer reactions occur within microsecond-to-millisecond time scales  
476 and electron-tunneling between complex III monomers is thought to maximize the efficiency of  
477 coupled redox reactions between monomers<sup>60</sup>. The generation of the free radical semiquinone  
478 during the Q cycle performed by complex III is proposed to be diminished by a mechanism that  
479 delays quinol oxidation in the Q<sub>o</sub> site when electron transfer is pharmacologically impaired<sup>61</sup>. If  
480 depletion of PE or mutagenesis of residues that interact with this lipid diminish the efficiency of  
481 electron transfer between complex III monomers or between complex III and its substrates, this  
482 could result in reduced complex III function as a means to prevent superoxide production.  
483 These structural observations will guide future efforts to determine the role(s) of PE as it relates  
484 to complex III activity.

## 485 **MATERIALS AND METHODS**

### 486 **Yeast strains and growth conditions**

489 All yeast strains used in this study are listed in Table 1 and were derived from GA74-1A unless  
490 otherwise noted. Deletion strains were generated by PCR-mediated gene replacement of the  
491 entire reading frame as previously described<sup>52</sup>. Psd1p containing a COOH-terminal 3XFLAG  
492 tag subcloned into pRS305 has been described<sup>17,29</sup>. To re-direct Psd1p to the mitochondrial  
493 OM, the first 100 amino acids of Psd1p, encompassing its mitochondrial targeting sequence and  
494 transmembrane domain, were replaced by the equivalent domains (amino acids 1-34) of the  
495 single-pass OM resident protein, Tom20p. ER-Psd1p, which is directed to the secretory  
496 pathway, was generated by replacing the first 57 amino acids of Psd1p, encompassing its  
497 mitochondrial targeting signal (MTS), with the N-terminal signal sequence (amino acids 1-23) of  
498 carboxypeptidase Y, as previously described<sup>29</sup>. Additionally, the ER-Psd1p construct contains  
499 an NXS *N*-glycosylation signal immediately downstream of the CPY leader sequence to track its  
500 topology. The IM-Psd1, OM-Psd1, and ER-Psd1 constructs, which all contained the C-terminal  
501 3XFLAG tag, were subcloned into the pRS305 plasmid, linearized, and integrated into the *LEU2*

502 locus in the *psd1Δpsd2Δ* background. Clones were selected on synthetic dropout medium  
503 (0.17% (w/v) yeast nitrogen base, 0.5% (w/v) ammonium sulfate, 0.2% (w/v) dropout mixture  
504 synthetic-leu, 2% (w/v) dextrose) and verified by immunoblot.

505 For strains that were genetically modified by homology-integrated clustered regulatory  
506 interspaced short palindromic repeats (CRISPR)-Cas (HI-CRISPR)<sup>62</sup>, CRISPR-Cas9 gene  
507 blocks were designed to target *CHO1* or *QCR7* and cloned into the pCRCT plasmid<sup>62</sup>, as  
508 previously described<sup>17</sup>. The spacer sequences (including the CRISPR-Cas9 target (20-bp) and  
509 the homology repair template (50-bp) homology arms on both sides (total 100-bp) flanking the  
510 Cas9 recognition sequence) were ordered as gBlocks (Integrated DNA Technologies).  
511 Specifically, *CHO1* knockout was achieved by incorporating an 8-bp deletion within the  
512 homology repair template to induce a frameshift mutation by removal of nucleotides 38-45  
513 downstream of the start ATG sequence of the *CHO1* open reading frame (ORF). The CRISPR  
514 construct was designed to target the protospacer adjacent motif (PAM) sequence encoded by  
515 nucleotides 40-42 on the reverse strand of the *CHO1* ORF. Single point mutations were  
516 introduced into the *QCR7* ORF at positions 244-246 downstream of the ATG start site to mutate  
517 Glu82 (GAG) to Asp82 (GAC) or Arg82 (AGA) through the design of homology repair templates  
518 encoding these mutations. Specificity of gene block integration into this locus was accomplished  
519 by targeting the PAM sequence encoded by nucleotides 209-211 on the reverse strand of the  
520 *QCR7* ORF. Both *QCR7* gene blocks encoded for silent alanine mutations at position 208-210  
521 to mutate the PAM sequence and prevent re-cleavage by Cas9 after homology-directed repair,  
522 and position 214-216 to prevent hairpin formation of gBlocks. Additionally, the homology arms  
523 adjacent to the PAM sequence were extended to 125-bp on each side for these constructs.  
524 Integration of gene blocks encoding for these mutations were verified by sequencing of yeast  
525 genomic DNA using primers specific for *QCR7*.

526 Yeast were grown on YPD (1% (w/v) yeast extract, 2% (w/v) tryptone, 2% (w/v) dextrose)  
527 plates. To assess the function of the assorted re-directed Psd1p constructs, overnight cultures



528 grown in synthetic complete dextrose (SCD; 0.17% (w/v) yeast nitrogen base, 0.5% (w/v)  
529 ammonium sulfate, 0.2% (w/v) complete amino acid mixture, 2% (w/v) dextrose) supplemented  
530 with 2mM ethanolamine hydrochloride were spotted on SCD plates in the absence or presence  
531 of 2mM ethanolamine hydrochloride, or spotted onto rich lactate (1% (w/v) yeast extract, 2%  
532 (w/v) tryptone, 0.05% (w/v) dextrose, 2% (v/v) lactic acid, 3.4mM CaCl<sub>2</sub>-2H<sub>2</sub>O, 8.5mM NaCl,  
533 2.95mM MgCl<sub>2</sub>-6H<sub>2</sub>O, 7.35mM KH<sub>2</sub>PO<sub>4</sub>, 18.7mM NH<sub>4</sub>Cl, pH 5.5), or synthetic complete ethanol  
534 glycerol (SCEG; 0.17% (w/v) yeast nitrogen base, 0.5% (w/v) ammonium sulfate, 0.2% (w/v)  
535 complete amino acid mixture, 1% (v/v) ethanol, 3% (v/v) glycerol) or synthetic complete lactate  
536 (SC-LAC; 0.17% (w/v) yeast nitrogen base, 0.5% (w/v) ammonium sulfate, 0.2% (w/v) complete  
537 amino acid mixture, 0.05% (w/v) dextrose, 2% (v/v) lactic acid, 3.4mM CaCl<sub>2</sub>-2H<sub>2</sub>O, 8.5mM  
538 NaCl, 2.95mM MgCl<sub>2</sub>-6H<sub>2</sub>O, 7.35mM KH<sub>2</sub>PO<sub>4</sub>, 18.7mM NH<sub>4</sub>Cl, pH 5.5) in the absence or  
539 presence of 2mM ethanolamine hydrochloride to test respiratory growth.

540 For CoQ<sub>6</sub> supplementation experiments, starter cultures were grown in SCD + 2mM  
541 ethanolamine overnight and diluted to 0.025 OD<sub>600</sub> in 500μL of either SCEG, SCEG + 2mM  
542 ethanolamine, SCEG + 2μM CoQ<sub>6</sub> (Avanti Polar Lipids, Inc), SCEG + 2μM CoQ<sub>6</sub> + 2mM  
543 ethanolamine, SCEG + 10μM CoQ<sub>6</sub>, or SCEG + 10μM CoQ<sub>6</sub> + 2mM ethanolamine in duplicate  
544 in a 48 well plate. OD<sub>600</sub> measurements were then recorded every 30 minutes for a period of 48  
545 hours at 30°C using a Tecan Infinite 200 Pro instrument. For experiments designed to test the  
546 importance of the pABA pathway for cell growth, synthetic media lacking pABA was utilized for  
547 liquid and solid growth of yeast cells. -pABA media consisted of 790 mg/mL CSM Mixture  
548 Complete (Formedium LTD) and 6.9g/L yeast nitrogen base lacking amino acids and *para*-  
549 amino benzoic acid (Formedium LTD). For +pABA media, the same mixture was used but  
550 included the addition of 100μM *para*-amino benzoic acid (Research Products International, Inc)  
551 dissolved in water and sterile filtered using a 0.20μM filter (Corning, Inc). Individual colonies of  
552 yeast were used to inoculate starter cultures in -pABA medium containing 2% (w/v) glucose and



553 2mM ethanolamine. Solid growth of yeast on agar plates was evaluated in -/+pABA medium  
554 containing 1% (v/v) ethanol and 3% (v/v) glycerol -/+ 2mM ethanolamine.

### 555 **Mitochondrial Isolation**

556 Isolation of crude mitochondria was performed as previously described<sup>63</sup>. Yeast were selected  
557 on rich lactate plates and grown on rich lactate media to prevent the loss of mitochondrial DNA.  
558 To improve growth on rich lactate, *psd1Δpsd2Δ* yeast were grown in the presence of 2mM  
559 choline prior to harvesting mitochondria (except where indicated in Fig 6A,B and in Fig 7).  
560 Purification of mitochondria by sucrose step gradient was performed as previously described<sup>29</sup>.

### 561 **Electron microscopy**

562 Cells were grown in rich lactate medium and harvested at mid-log phase by centrifugation. Cells  
563 were fixed in 3% glutaraldehyde contained in 0.1 M sodium cacodylate, pH 7.4, 5 mM CaCl<sub>2</sub>, 5  
564 mM MgCl<sub>2</sub>, and 2.5% (w/v) sucrose for 1 hr at room temperature with gentle agitation,  
565 spheroplasted, embedded in 2% ultra-low temperature agarose (prepared in water), cooled, and  
566 subsequently cut into small pieces (~1 mm<sup>3</sup>) as previously described<sup>52</sup>. The cells were then  
567 post-fixed in 1% OsO<sub>4</sub>, 1% potassium ferrocyanide contained in 0.1 M sodium cacodylate, 5  
568 mM CaCl<sub>2</sub>, pH 7.4, for 30 min at room temperature. The blocks were washed thoroughly four  
569 times with double distilled H<sub>2</sub>O, 10 min total, transferred to 1% thiocarbohydrazide at room  
570 temperature for 3 min, washed in double distilled H<sub>2</sub>O (four times, 1 min each), and transferred  
571 to 1% OsO<sub>4</sub>, 1% potassium ferrocyanide in 0.1 M sodium cacodylate, pH 7.4, for an additional 3  
572 min at room temperature. The cells were washed four times with double distilled H<sub>2</sub>O (15 min  
573 total), stained *en bloc* in Kellenberger's uranyl acetate for 2 hr to overnight, dehydrated through  
574 a graded series of ethanol, and subsequently embedded in Spurr resin. Sections were cut on a  
575 Reichert Ultracut T ultramicrotome, post-stained with uranyl acetate and lead citrate, and  
576 observed on an FEI Tecnai 12 transmission electron microscope at 100 kV. Images were  
577 recorded with a Soft Imaging System Megaview III digital camera, and figures were assembled  
578 in Adobe Photoshop with only linear adjustments in contrast and brightness.

579 **mtDNA quantitation**

580 DNA was extracted as described <sup>64</sup>. In brief, yeast cells were grown for 2 days in rich lactate  
581 and the collected cell pellets were vortexed at level 10 for 3 minutes with 200 $\mu$ L breaking buffer  
582 (2% (v/v) Triton X-100, 1% (v/v) SDS, 100mM NaCl, 10mM Tris pH8.0, 1mM EDTA pH 8.0),  
583 0.3g glass beads, and 200 $\mu$ L phenol/chloroform/isoamyl alcohol at room temperature. The  
584 solution was neutralized with the addition of 200 $\mu$ L of Tris-EDTA (TE) buffer pH 8.0 and phases  
585 were separated by centrifugation at 21,000 x *g* for 5 minutes. The aqueous phase was collected  
586 and DNA was precipitated by the addition of 100% ethanol and collected in the pellet after  
587 centrifugation at 21,000 x *g* for 3 minutes. The pellets were resuspended in 400 $\mu$ L TE buffer, pH  
588 8.0 and RNA was digested with the addition of 3  $\mu$ L of 10mg/mL RNase A and incubation at  
589 37°C for 5 minutes before addition of 10  $\mu$ L of 4M Ammonium acetate and 1 mL 100% ethanol.  
590 DNA pellets were recovered by centrifugation at 21,000 x *g* for 3 minutes, dried, and  
591 resuspended in 30  $\mu$ L TE buffer pH 8.0. DNA was stored at -80°C until ready for use,  
592 quantitated, and a portion diluted to 10ng/ $\mu$ L to be used as template in the qPCR reaction. The  
593 FastStart Universal SYBR Green Master Rox (Roche) was used for qPCR performed according  
594 to the manufacturer's instructions. 50ng of genomic DNA was used as a template and the  
595 following primers were used at 100nM concentration in a 20 $\mu$ L reaction: *COX1* forward (5'-  
596 CTACAGATACAGCATTTC AAGA-3'), *COX1* reverse (5'- GTGCCTGAATAGATGATAATGGT-  
597 3'), *ACT1* forward (5'- GTATGTGTAAAGCCGGTTTTG-3'), and *ACT1* reverse (5'-  
598 CATGATACCTTGGTGTCTTGG -3'). The reactions were performed in technical duplicate with  
599 three biological replicates. After completion of thermocycling in a QuantStudio 6 Flex Real-Time  
600 PCR System (Thermo Fisher), melting-curve data was collected to verify PCR specificity. The  
601 absence of primer dimers and the Ct value difference between the nuclear (*ACT1*) and  
602 mitochondrial (*COX1*) target were computed as a measure of the mitochondrial DNA copy  
603 number relative to the nuclear genome.

## 604 **Mitochondrial respiration measurements**

605 Mitochondrial oxygen consumption was measured using a Clark-type oxygen electrode in a  
606 magnetically stirred, thermostatically controlled 1.5 mL chamber at 25°C (Oxytherm; Hansatech)  
607 as previously described<sup>65</sup> with some variations. 100µg of mitochondria were resuspended in  
608 0.25M sucrose, 0.25mg/mL BSA, 20mM KCl, 20mM Tris-Cl, 0.5mM EDTA, 4mM KH<sub>2</sub>PO<sub>4</sub>, and  
609 3mM MgCl<sub>2</sub>, pH 7.2. After addition of 1mM ascorbate + 0.3mM TMPD, state 2 rate was  
610 monitored for approximately 30 sec. State 3 respiration was initiated by addition of 50µM ADP.  
611 After state 4 rate was measured, 10µM CCCP was added to induce uncoupled respiration, and  
612 the rate was followed for either 2 minutes or until oxygen level reached zero.

## 613 **Complex III and IV Activity Measurements**

614 Complex III and IV activities were measured as described<sup>66,67</sup>. To measure complex III activity,  
615 25µg of mitochondria solubilized in 0.5% (w/v) *n*-dodecyl-β-D-maltoside were added to reaction  
616 buffer (50mM KP<sub>i</sub>, 2mM EDTA, pH 7.4) with 0.008% (w/v) horse heart cytochrome *c* and 1mM  
617 KCN. The reaction was started by adding 100µM decylubiquinol, and the reduction of  
618 cytochrome *c* followed at 550nm. Complex IV activity was initiated by adding 5µg of solubilized  
619 mitochondria to reaction buffer with 0.008% ferrocyanochrome *c* and measured by recording  
620 cytochrome *c* oxidation at 550nm.

## 621 **Antibodies**

622 Most antibodies used in this study were generated by our laboratory or in the laboratories of J.  
623 Schatz (University of Basel, Basel, Switzerland) or C. Koehler (UCLA) and have been described  
624 previously<sup>3,63,65,67-69</sup>. Other antibodies used were mouse anti-Sec62p (kind gift of Dr. David  
625 Meyers (UCLA)), mouse anti-FLAG (clone M2, Sigma), mouse anti-Dpm1p (113686, Abcam),  
626 rabbit anti-Qcr7p<sup>70</sup>, rabbit antisera reactive to Coq1p<sup>71</sup>, Coq4p<sup>72</sup>, Coq7p<sup>73</sup>, or Coq9p<sup>74</sup>, rabbit  
627 antisera raised against the C-terminus of Cho1p<sup>34</sup>, rabbit anti-Kar2p<sup>36</sup> and horseradish

628 peroxidase-conjugated (Thermo Fisher Scientific) or IRDye 800CW (LI-COR) secondary  
629 antibodies.

### 630 **Miscellaneous**

631 Preparation of yeast cell extracts, submitochondrial fractionation, phospholipid analysis, 1D BN-  
632 PAGE, and immunoblotting were performed as described previously<sup>17,29</sup>. Immunoblots using IR  
633 800 CW secondary antibodies were imaged using an Odyssey CLx Imaging System.  
634 Immunoblots and TLC plates were quantitated by Quantity One Software by Bio-Rad  
635 Laboratories. Statistical comparisons (ns,  $P > 0.05$ ; 1 symbol  $P \leq 0.05$ ; 2 symbols  $P \leq 0.01$ ; 3  
636 symbols  $P \leq 0.001$ ; 4 symbols  $P \leq 0.0001$ ) were performed by student *t* test or one-way analysis  
637 of variance (ANOVA) with Holm-Sidak pairwise comparison using SigmaPlot 11 software  
638 (Systat Software, San Jose, CA);  $P \leq 0.05$  were deemed significant. In some cases, replicates  
639 of samples were loaded on the same SDS-PAGE gel, and thus borders of neighboring samples  
640 may be detected on the borders of some immunoblots. All graphs show the mean  $\pm$  S.E.M. At  
641 least three biological replicates represent each of the experiments performed in this study,  
642 unless otherwise indicated.

### 643 **REFERENCES**

- 645 1 Birner, R., Burgermeister, M., Schneiter, R. & Daum, G. Roles of  
646 phosphatidylethanolamine and of its several biosynthetic pathways in *Saccharomyces*  
647 *cerevisiae*. *Mol Biol Cell* **12**, 997-1007 (2001).
- 648 2 Horvath, S. E. *et al.* Processing and topology of the yeast mitochondrial  
649 phosphatidylserine decarboxylase 1. *J Biol Chem* **287**, 36744-36755,  
650 doi:10.1074/jbc.M112.398107 (2012).
- 651 3 Tamura, Y. *et al.* Phosphatidylethanolamine biosynthesis in mitochondria:  
652 phosphatidylserine (PS) trafficking is independent of a PS decarboxylase and  
653 intermembrane space proteins UPS1P and UPS2P. *J Biol Chem* **287**, 43961-43971,  
654 doi:10.1074/jbc.M112.390997 (2012).
- 655 4 Zborowski, J., Dygas, A. & Wojtczak, L. Phosphatidylserine decarboxylase is located on  
656 the external side of the inner mitochondrial membrane. *FEBS Lett* **157**, 179-182 (1983).
- 657 5 Trotter, P. J. & Voelker, D. R. Identification of a non-mitochondrial phosphatidylserine  
658 decarboxylase activity (PSD2) in the yeast *Saccharomyces cerevisiae*. *J Biol Chem* **270**,  
659 6062-6070 (1995).
- 660 6 Calzada, E., Onguka, O. & Claypool, S. M. Phosphatidylethanolamine Metabolism in  
661 Health and Disease. *Int Rev Cell Mol Biol* **321**, 29-88, doi:10.1016/bs.ircmb.2015.10.001  
662 (2016).

- 663 7 Steenbergen, R. *et al.* Disruption of the phosphatidylserine decarboxylase gene in mice  
664 causes embryonic lethality and mitochondrial defects. *J Biol Chem* **280**, 40032-40040,  
665 doi:10.1074/jbc.M506510200 (2005).
- 666 8 Fullerton, M. D., Hakimuddin, F. & Bakovic, M. Developmental and metabolic effects of  
667 disruption of the mouse CTP:phosphoethanolamine cytidyltransferase gene (Pcyt2). *Mol*  
668 *Cell Biol* **27**, 3327-3336, doi:10.1128/MCB.01527-06 (2007).
- 669 9 Bottinger, L. *et al.* Phosphatidylethanolamine and cardiolipin differentially affect the  
670 stability of mitochondrial respiratory chain supercomplexes. *J Mol Biol* **423**, 677-686,  
671 doi:10.1016/j.jmb.2012.09.001 (2012).
- 672 10 Tasseva, G. *et al.* Phosphatidylethanolamine deficiency in Mammalian mitochondria  
673 impairs oxidative phosphorylation and alters mitochondrial morphology. *J Biol Chem* **288**,  
674 4158-4173, doi:10.1074/jbc.M112.434183 (2013).
- 675 11 Chan, E. Y. & McQuibban, G. A. Phosphatidylserine decarboxylase 1 (Psd1) promotes  
676 mitochondrial fusion by regulating the biophysical properties of the mitochondrial  
677 membrane and alternative topogenesis of mitochondrial genome maintenance protein 1  
678 (Mgm1). *J Biol Chem* **287**, 40131-40139, doi:10.1074/jbc.M112.399428 (2012).
- 679 12 Joshi, A. S., Thompson, M. N., Fei, N., Huttemann, M. & Greenberg, M. L. Cardiolipin and  
680 mitochondrial phosphatidylethanolamine have overlapping functions in mitochondrial  
681 fusion in *Saccharomyces cerevisiae*. *J Biol Chem* **287**, 17589-17597,  
682 doi:10.1074/jbc.M111.330167 (2012).
- 683 13 Burgermeister, M., Birner-Grunberger, R., Nebauer, R. & Daum, G. Contribution of  
684 different pathways to the supply of phosphatidylethanolamine and phosphatidylcholine to  
685 mitochondrial membranes of the yeast *Saccharomyces cerevisiae*. *Biochim Biophys Acta*  
686 **1686**, 161-168, doi:10.1016/j.bbali.2004.09.007 (2004).
- 687 14 Gulshan, K., Shahi, P. & Moye-Rowley, W. S. Compartment-specific synthesis of  
688 phosphatidylethanolamine is required for normal heavy metal resistance. *Mol Biol Cell* **21**,  
689 443-455, doi:10.1091/mbc.E09-06-0519 (2010).
- 690 15 Di Bartolomeo, F., Wagner, A. & Daum, G. Cell biology, physiology and enzymology of  
691 phosphatidylserine decarboxylase. *Biochim Biophys Acta* **1862**, 25-38,  
692 doi:10.1016/j.bbali.2016.09.007 (2017).
- 693 16 Choi, J. Y., Duraisingh, M. T., Marti, M., Ben Mamoun, C. & Voelker, D. R. From Protease  
694 to Decarboxylase: THE MOLECULAR METAMORPHOSIS OF PHOSPHATIDYLSERINE  
695 DECARBOXYLASE. *J Biol Chem* **290**, 10972-10980, doi:10.1074/jbc.M115.642413  
696 (2015).
- 697 17 Ogunbona, O. B., Onguka, O., Calzada, E. & Claypool, S. M. Multitiered and Cooperative  
698 Surveillance of Mitochondrial Phosphatidylserine Decarboxylase 1. *Mol Cell Biol* **37**,  
699 doi:10.1128/MCB.00049-17 (2017).
- 700 18 Vance, J. E. Phospholipid synthesis in a membrane fraction associated with mitochondria.  
701 *J Biol Chem* **265**, 7248-7256 (1990).
- 702 19 Voelker, D. R. Phosphatidylserine functions as the major precursor of  
703 phosphatidylethanolamine in cultured BHK-21 cells. *Proc Natl Acad Sci U S A* **81**, 2669-  
704 2673 (1984).
- 705 20 Elbaz-Alon, Y. *et al.* A dynamic interface between vacuoles and mitochondria in yeast.  
706 *Dev Cell* **30**, 95-102, doi:10.1016/j.devcel.2014.06.007 (2014).
- 707 21 Kojima, R., Endo, T. & Tamura, Y. A phospholipid transfer function of ER-mitochondria  
708 encounter structure revealed in vitro. *Scientific reports* **6**, 30777, doi:10.1038/srep30777  
709 (2016).
- 710 22 Kornmann, B. *et al.* An ER-mitochondria tethering complex revealed by a synthetic biology  
711 screen. *Science* **325**, 477-481, doi:10.1126/science.1175088 (2009).

- 712 23 Lahiri, S. *et al.* A conserved endoplasmic reticulum membrane protein complex (EMC)  
713 facilitates phospholipid transfer from the ER to mitochondria. *PLoS Biol* **12**, e1001969,  
714 doi:10.1371/journal.pbio.1001969 (2014).
- 715 24 Nguyen, T. T. *et al.* Gem1 and ERMES do not directly affect phosphatidylserine transport  
716 from ER to mitochondria or mitochondrial inheritance. *Traffic* **13**, 880-890,  
717 doi:10.1111/j.1600-0854.2012.01352.x (2012).
- 718 25 Miyata, N., Watanabe, Y., Tamura, Y., Endo, T. & Kuge, O. Phosphatidylserine transport  
719 by Ups2–Mdm35 in respiration-active mitochondria. *The Journal of Cell Biology* **214**, 77-  
720 88, doi:10.1083/jcb.201601082 (2016).
- 721 26 Aaltonen, M. J. *et al.* MICOS and phospholipid transfer by Ups2-Mdm35 organize  
722 membrane lipid synthesis in mitochondria. *J Cell Biol* **213**, 525-534,  
723 doi:10.1083/jcb.201602007 (2016).
- 724 27 Riekhof, W. R. & Voelker, D. R. Uptake and utilization of lyso-phosphatidylethanolamine  
725 by *Saccharomyces cerevisiae*. *J Biol Chem* **281**, 36588-36596,  
726 doi:10.1074/jbc.M608851200 (2006).
- 727 28 Baker, C. D., Basu Ball, W., Pryce, E. N. & Gohil, V. M. Specific requirements of nonbilayer  
728 phospholipids in mitochondrial respiratory chain function and formation. *Mol Biol Cell* **27**,  
729 2161-2171, doi:10.1091/mbc.E15-12-0865 (2016).
- 730 29 Onguka, O., Calzada, E., Ogunbona, O. B. & Claypool, S. M. Phosphatidylserine  
731 decarboxylase 1 autocatalysis and function does not require a mitochondrial-specific  
732 factor. *J Biol Chem* **290**, 12744-12752, doi:10.1074/jbc.M115.641118 (2015).
- 733 30 Guo, R., Zong, S., Wu, M., Gu, J. & Yang, M. Architecture of Human Mitochondrial  
734 Respiratory Megacomplex I2III2IV2. *Cell* **170**, 1247-1257 e1212,  
735 doi:10.1016/j.cell.2017.07.050 (2017).
- 736 31 Lange, C., Nett, J. H., Trumpower, B. L. & Hunte, C. Specific roles of protein-phospholipid  
737 interactions in the yeast cytochrome bc1 complex structure. *EMBO J* **20**, 6591-6600,  
738 doi:10.1093/emboj/20.23.6591 (2001).
- 739 32 Johnson, L. M., Bankaitis, V. A. & Emr, S. D. Distinct sequence determinants direct  
740 intracellular sorting and modification of a yeast vacuolar protease. *Cell* **48**, 875-885  
741 (1987).
- 742 33 Storey, M. K. *et al.* Phosphatidylethanolamine has an essential role in *Saccharomyces*  
743 *cerevisiae* that is independent of its ability to form hexagonal phase structures. *J Biol*  
744 *Chem* **276**, 48539-48548, doi:10.1074/jbc.M109043200 (2001).
- 745 34 Choi, H. S., Han, G. S. & Carman, G. M. Phosphorylation of yeast phosphatidylserine  
746 synthase by protein kinase A: identification of Ser46 and Ser47 as major sites of  
747 phosphorylation. *J Biol Chem* **285**, 11526-11536, doi:10.1074/jbc.M110.100727 (2010).
- 748 35 Kodaki, T. & Yamashita, S. Yeast phosphatidylethanolamine methylation pathway.  
749 Cloning and characterization of two distinct methyltransferase genes. *J Biol Chem* **262**,  
750 15428-15435 (1987).
- 751 36 Huyer, G. *et al.* Distinct machinery is required in *Saccharomyces cerevisiae* for the  
752 endoplasmic reticulum-associated degradation of a multispanning membrane protein and  
753 a soluble luminal protein. *J Biol Chem* **279**, 38369-38378, doi:10.1074/jbc.M402468200  
754 (2004).
- 755 37 Trotter, P. J., Pedretti, J. & Voelker, D. R. Phosphatidylserine decarboxylase from  
756 *Saccharomyces cerevisiae*. Isolation of mutants, cloning of the gene, and creation of a  
757 null allele. *J Biol Chem* **268**, 21416-21424 (1993).
- 758 38 Schagger, H. & Pfeiffer, K. Supercomplexes in the respiratory chains of yeast and  
759 mammalian mitochondria. *EMBO J* **19**, 1777-1783, doi:10.1093/emboj/19.8.1777 (2000).
- 760 39 He, C. H., Xie, L. X., Allan, C. M., Tran, U. C. & Clarke, C. F. Coenzyme Q supplementation  
761 or over-expression of the yeast Coq8 putative kinase stabilizes multi-subunit Coq



- 762 polypeptide complexes in yeast coq null mutants. *Biochim Biophys Acta* **1841**, 630-644,  
763 doi:10.1016/j.bbaliip.2013.12.017 (2014).
- 764 40 Sevin, D. C. & Sauer, U. Ubiquinone accumulation improves osmotic-stress tolerance in  
765 *Escherichia coli*. *Nature chemical biology* **10**, 266-272, doi:10.1038/nchembio.1437  
766 (2014).
- 767 41 Stefely, J. A. *et al.* Mitochondrial protein functions elucidated by multi-omic mass  
768 spectrometry profiling. *Nat Biotechnol* **34**, 1191-1197, doi:10.1038/nbt.3683 (2016).
- 769 42 Jiang, F. *et al.* Absence of cardiolipin in the crd1 null mutant results in decreased  
770 mitochondrial membrane potential and reduced mitochondrial function. *J Biol Chem* **275**,  
771 22387-22394, doi:10.1074/jbc.M909868199 (2000).
- 772 43 Atkinson, K. D. *et al.* Yeast mutants auxotrophic for choline or ethanolamine. *J Bacteriol*  
773 **141**, 558-564 (1980).
- 774 44 Wang, S. *et al.* Phosphatidylethanolamine deficiency disrupts alpha-synuclein  
775 homeostasis in yeast and worm models of Parkinson disease. *Proc Natl Acad Sci U S A*  
776 **111**, E3976-3985, doi:10.1073/pnas.1411694111 (2014).
- 777 45 Nestic, I. *et al.* Alterations in phosphatidylethanolamine levels affect the generation of  
778 A $\beta$ . *Aging Cell* **11**, 63-72, doi:10.1111/j.1474-9726.2011.00760.x (2012).
- 779 46 Keckesova, Z. *et al.* LACTB is a tumour suppressor that modulates lipid metabolism and  
780 cell state. *Nature* **543**, 681-686, doi:10.1038/nature21408 (2017).
- 781 47 Kainu, V., Hermansson, M., Hanninen, S., Hokynar, K. & Somerharju, P. Import of  
782 phosphatidylserine to and export of phosphatidylethanolamine molecular species from  
783 mitochondria. *Biochim Biophys Acta* **1831**, 429-437, doi:10.1016/j.bbaliip.2012.11.003  
784 (2013).
- 785 48 Bleijerveld, O. B., Brouwers, J. F., Vaandrager, A. B., Helms, J. B. & Houweling, M. The  
786 CDP-ethanolamine pathway and phosphatidylserine decarboxylation generate different  
787 phosphatidylethanolamine molecular species. *J Biol Chem* **282**, 28362-28372,  
788 doi:10.1074/jbc.M703786200 (2007).
- 789 49 Burgermeister, M., Birner-Grunberger, R., Heyn, M. & Daum, G. Contribution of different  
790 biosynthetic pathways to species selectivity of aminoglycerophospholipids assembled into  
791 mitochondrial membranes of the yeast *Saccharomyces cerevisiae*. *Biochim Biophys Acta*  
792 **1686**, 148-160, doi:10.1016/j.bbaliip.2004.09.005 (2004).
- 793 50 Schneiter, R. *et al.* Electrospray ionization tandem mass spectrometry (ESI-MS/MS)  
794 analysis of the lipid molecular species composition of yeast subcellular membranes  
795 reveals acyl chain-based sorting/remodeling of distinct molecular species en route to the  
796 plasma membrane. *J Cell Biol* **146**, 741-754 (1999).
- 797 51 Sastri, M. *et al.* Sub-mitochondrial localization of the genetic-tagged mitochondrial  
798 intermembrane space-bridging components Mic19, Mic60 and Sam50. *J Cell Sci* **130**,  
799 3248-3260, doi:10.1242/jcs.201400 (2017).
- 800 52 Baile, M. G. *et al.* Unremodeled and remodeled cardiolipin are functionally  
801 indistinguishable in yeast. *J Biol Chem* **289**, 1768-1778, doi:10.1074/jbc.M113.525733  
802 (2014).
- 803 53 Pfeiffer, K. *et al.* Cardiolipin stabilizes respiratory chain supercomplexes. *J Biol Chem* **278**,  
804 52873-52880, doi:10.1074/jbc.M308366200 (2003).
- 805 54 Miyata, N., Goda, N., Matsuo, K., Hoketsu, T. & Kuge, O. Cooperative function of Fmp30,  
806 Mdm31, and Mdm32 in Ups1-independent cardiolipin accumulation in the yeast  
807 *Saccharomyces cerevisiae*. *Sci Rep* **7**, 16447, doi:10.1038/s41598-017-16661-2 (2017).
- 808 55 Tamura, Y., Endo, T., Iijima, M. & Sesaki, H. Ups1p and Ups2p antagonistically regulate  
809 cardiolipin metabolism in mitochondria. *J Cell Biol* **185**, 1029-1045,  
810 doi:10.1083/jcb.200812018 (2009).

- 811 56 Lu, Y. W. & Claypool, S. M. Disorders of phospholipid metabolism: an emerging class of  
812 mitochondrial disease due to defects in nuclear genes. *Front Genet* **6**, 3,  
813 doi:10.3389/fgene.2015.00003 (2015).
- 814 57 Connerth, M. *et al.* Intramitochondrial transport of phosphatidic acid in yeast by a lipid  
815 transfer protein. *Science* **338**, 815-818, doi:10.1126/science.1225625 (2012).
- 816 58 Watanabe, Y., Tamura, Y., Kawano, S. & Endo, T. Structural and mechanistic insights into  
817 phospholipid transfer by Ups1-Mdm35 in mitochondria. *Nat Commun* **6**, 7922,  
818 doi:10.1038/ncomms8922 (2015).
- 819 59 Hunte, C., Koepke, J., Lange, C., Rossmann, T. & Michel, H. Structure at 2.3 Å resolution  
820 of the cytochrome bc<sub>1</sub> complex from the yeast *Saccharomyces cerevisiae* co-crystallized  
821 with an antibody Fv fragment. *Structure* **8**, 669-684 (2000).
- 822 60 Swierczek, M. *et al.* An electronic bus bar lies in the core of cytochrome bc<sub>1</sub>. *Science* **329**,  
823 451-454, doi:10.1126/science.1190899 (2010).
- 824 61 Quinlan, C. L., Gerencser, A. A., Treberg, J. R. & Brand, M. D. The mechanism of  
825 superoxide production by the antimycin-inhibited mitochondrial Q-cycle. *J Biol Chem* **286**,  
826 31361-31372, doi:10.1074/jbc.M111.267898 (2011).
- 827 62 Bao, Z. *et al.* Homology-Integrated CRISPR-Cas (HI-CRISPR) System for One-Step  
828 Multigene Disruption in *Saccharomyces cerevisiae*. *ACS Synthetic Biology* **4**, 585-594,  
829 doi:10.1021/sb500255k (2015).
- 830 63 Claypool, S. M., McCaffery, J. M. & Koehler, C. M. Mitochondrial mislocalization and  
831 altered assembly of a cluster of Barth syndrome mutant tafazzins. *The Journal of cell*  
832 *biology* **174**, 379-390. PMID: PMC2064234, doi:jcb.200605043 [pii]  
833 10.1083/jcb.200605043 (2006).
- 834 64 Hoffman, C. S. Preparation of yeast DNA. *Curr Protoc Mol Biol* **Chapter 13**, Unit13.11,  
835 doi:10.1002/0471142727.mb1311s39 (2001).
- 836 65 Claypool, S. M., Oktay, Y., Boontheung, P., Loo, J. A. & Koehler, C. M. Cardiolipin defines  
837 the interactome of the major ADP/ATP carrier protein of the mitochondrial inner  
838 membrane. *J Cell Biol* **182**, 937-950, doi:10.1083/jcb.200801152 (2008).
- 839 66 Tzagoloff, A., Akai, A. & Needleman, R. B. Assembly of the mitochondrial membrane  
840 system: isolation of nuclear and cytoplasmic mutants of *Saccharomyces cerevisiae* with  
841 specific defects in mitochondrial functions. *J Bacteriol* **122**, 826-831 (1975).
- 842 67 Baile, M. G., Whited, K. & Claypool, S. M. Deacylation on the matrix side of the  
843 mitochondrial inner membrane regulates cardiolipin remodeling. *Mol Biol Cell* **24**, 2008-  
844 2020, doi:10.1091/mbc.E13-03-0121 (2013).
- 845 68 Whited, K., Baile, M. G., Currier, P. & Claypool, S. M. Seven functional classes of Barth  
846 syndrome mutation. *Hum Mol Genet* **22**, 483-492, doi:10.1093/hmg/ddr447 (2013).
- 847 69 Riezman, H. *et al.* Import of proteins into mitochondria: a 70 kilodalton outer membrane  
848 protein with a large carboxy-terminal deletion is still transported to the outer membrane.  
849 *EMBO J* **2**, 2161-2168 (1983).
- 850 70 Hildenbeutel, M. *et al.* Assembly factors monitor sequential hemylation of cytochrome  
851 *b* to regulate mitochondrial translation. *The Journal of Cell Biology* **205**, 511-  
852 524, doi:10.1083/jcb.201401009 (2014).
- 853 71 Gin, P. & Clarke, C. F. Genetic Evidence for a Multi-subunit Complex in Coenzyme Q  
854 Biosynthesis in Yeast and the Role of the Coq1 Hexaprenyl Diphosphate Synthase.  
855 *Journal of Biological Chemistry* **280**, 2676-2681, doi:10.1074/jbc.M411527200 (2005).
- 856 72 Belogradov, G. I. *et al.* Yeast COQ4 Encodes a Mitochondrial Protein Required for  
857 Coenzyme Q Synthesis. *Archives of Biochemistry and Biophysics* **392**, 48-58,  
858 doi:<https://doi.org/10.1006/abbi.2001.2448> (2001).
- 859 73 Tran, U. C. *et al.* Complementation of *Saccharomyces cerevisiae* coq7 Mutants by  
860 Mitochondrial Targeting of the *Escherichia coli* UbiF Polypeptide: TWO FUNCTIONS OF



861 YEAST COQ7 POLYPEPTIDE IN COENZYME Q BIOSYNTHESIS. *Journal of Biological*  
862 *Chemistry* **281**, 16401-16409, doi:10.1074/jbc.M513267200 (2006).  
863 74 Hsieh, E. J., Dinoso, J. B. & Clarke, C. F. A tRNATRP gene mediates the suppression of  
864 cbs2-223 previously attributed to ABC1/COQ8. *Biochemical and Biophysical Research*  
865 *Communications* **317**, 648-653, doi:<https://doi.org/10.1016/j.bbrc.2004.03.096> (2004).  
866

## 867 **ACKNOWLEDGEMENTS**

868 We would like to thank Drs. Carla Koehler (UCLA), Cathy Clarke (UCLA), Martin Ott (Stockholm  
869 University), Susan Michaelis (Johns Hopkins University School of Medicine), and George  
870 Carman (Rutgers University) for antibodies, Drs. Ya-Wen Lu, Ouma Onguka, Seun Ogunbona,  
871 and Matthew G. Baile for technical assistance, and Erica Avery for revision of this manuscript.  
872 This work was supported by the National Institutes of Health (R01GM111548 to S.M.C. and  
873 T32GM007445 to E.C.). The authors declare no competing financial interests.

## 874 **AUTHOR CONTRIBUTIONS**

875 E. C. and S. M. C. co-wrote and performed experiments for this manuscript. J. M. M. performed  
876 all electron microscopy sample preparation, sectioning, and imaging.

## 877 **COMPETING INTERESTS**

878 The authors declare no competing interests in the design and/or interpretation of this study.

## 879 **MATERIALS & CORRESPONDENCE**

880 Correspondence and material requests should be directed to S.M.C.

## 881 **FIGURE LEGENDS**

882 **Fig 1. Ethanolamine supplementation fails to rescue the growth defect of *psd1Δ* on**  
883 **respiratory medium in 4 separate yeast strains.** (A, B) The indicated strains were pre-cultured  
884 at 30°C in YPD and spotted onto (A) synthetic complete dextrose (SCD) or ethanol-glycerol  
885 (SCEG) medium +/- 2mM ethanolamine (+E) or (B) SCEG +/- 10mM ethanolamine and incubated  
886 at 30°C for 3 days.

887

888 **Fig 2. OM-Psd1p and ER-Psd1p constructs are functional and localize to the OM and ER,**  
889 **respectfully.** (A) Schematic of IM-Psd1p, OM-Psd1p, and ER-Psd1p. All three constructs contain  
890 a 3XFLAG tag at the C-terminus (yellow). The Tom20 residues (1-100) that replace the  
891 mitochondrial targeting sequence (MT) and transmembrane (TM) domain of IM-Psd1p (green)  
892 are shown for OM-Psd1p (blue), and the carboxypeptidase Y signal sequence (residues 1-37) as  
893 well as an NXS motif are indicated for ER-Psd1p (purple). (B) The  $\beta$  and  $\alpha$  subunits of Psd1p  
894 were detected in yeast whole cell extracts of the indicated strains by immunoblot. Tom70p served  
895 as a loading control. (C) The indicated strains were spotted onto synthetic complete dextrose  
896 (SCD) medium +/- 2mM ethanolamine (+E) and incubated at 30°C for 4 days. (D) Protease  
897 protection assay in intact mitochondria (Mito), osmotically ruptured mitochondria (MP), or  
898 deoxycholate-solubilized mitochondria (Det.). Following incubation +/- 100 $\mu$ g proteinase K (Prot.  
899 K) for 30 minutes, samples were collected, resolved by SDS-PAGE and immunoblotted for Psd1p  
900 ( $\beta$  and  $\alpha$  subunits), and the mitochondrial compartment-specific markers Tom70p (OM), Tim54p  
901 (IM), and Abf2p (matrix). (E) Illustration indicating the topology of (1) IM-Psd1p, (2) OM-Psd1p,  
902 and (3) ER-Psd1p.

903  
904 **Fig 3. OM-Psd1 and ER-Psd1 contain robust levels of PE in both cellular and mitochondrial**  
905 **membranes.** (A-F) Cellular and (G-L) mitochondrial phospholipids from the indicated strains were  
906 labeled overnight with  $^{32}$ P<sub>i</sub> and separated by TLC. All graphs show the mean  $\pm$  S.E.M. for n=6  
907 biological replicates. Significant differences compared to WT were calculated by one-way  
908 ANOVA. (M) Key for symbols used for statistical analysis interpretation by one-way ANOVA when  
909 comparing samples *versus* WT (\*), *psd1 $\Delta$ psd2 $\Delta$*  (#), or IM-Psd1 (\$).

910  
911 **Fig 4. OM-Psd1 and ER-Psd1 OXPHOS function phenocopies *psd1 $\Delta$* .** (A) The indicated  
912 strains were spotted and incubated at 30°C for 2 days on SCD +/- 2mM ethanolamine (+E) and

913 for 5 days on rich lactate (RL), SC lactate (SC-LAC), and SCEG +/- 2mM ethanolamine (+E). (B-  
914 E) O<sub>2</sub> consumption measurements from mitochondria isolated from yeast grown in rich lactate  
915 using ascorbate-TMPD as a substrate. (B) The maximal respiratory rate was recorded after the  
916 addition of CCCP, (C) state 3 respiration was assessed after addition of ADP, and (D) state 4  
917 respiration was recorded following ADP depletion. (E) The respiratory control ratio (RCR) is  
918 calculated by dividing state 3 by state 4 respiratory rates. Analysis *versus* WT (\*), *psd1Δpsd2Δ*  
919 (#), or IM-Psd1 (\$) was performed by one-way ANOVA ± S.E.M. for n=4.

920

921 **Fig 5. Complex III and IV activities are impaired when Psd1p is absent in the IM.** (A) mtDNA  
922 was isolated from the indicated strains, normalized, and quantified by qPCR. Analysis was  
923 performed by one-way ANOVA ± S.E.M. for n=3. (B) Spectrophotometric assay following the  
924 oxidation of cytochrome *c* at 550nm in isolated mitochondria solubilized in 0.5% (w/v) DDM.  
925 Analysis *versus* WT (\*), *psd1Δpsd2Δ* (#), or IM-Psd1 (\$) was performed by one-way ANOVA ±  
926 S.E.M. for n=6 or n=3 for  $p^0$ . P values for decreases that didn't achieve significance are reported  
927 in red and were analyzed by student *t*-test *versus* WT. (C) Mitochondria from the indicated strains  
928 were immunoblotted for subunits of complex III (CIII), complex IV (CIV), complex V (CV), the Coq  
929 synthome, cytochrome *c*, and markers of each mitochondrial compartment. (D, E) Blue native-  
930 PAGE analysis of respiratory supercomplexes (RSCs) using mitochondrial extracts solubilized in  
931 1.5% (w/v) digitonin. (D) Complex IV assembly was monitored by immunoblot against the nuclear-  
932 encoded subunit Cox4p and (E) Complex III assembly was monitored by immunoblot against the  
933 nuclear-encoded subunit Rip1p. Mitochondria lacking CL (*crd1Δ*) were used as a positive control  
934 for RSC destabilization<sup>53</sup>. (F) Spectrophotometric assay following the reduction of cytochrome *c*  
935 at 550nm in isolated mitochondria solubilized in 0.5% (w/v) DDM. Analysis *versus* WT (\*),  
936 *psd1Δpsd2Δ* (#), or IM-Psd1 (\$) was performed by one-way ANOVA ± S.E.M for n=6 or n=3 for

937  $\rho^0$ . P values for decreases that didn't achieve significance are reported in red and were analyzed  
938 by student *t*-test *versus* WT.

939

940 **Fig 6. The Kennedy Pathway for PE synthesis can rescue the activity of complex IV but not**

941 **complex III.** Spectrophotometric assay following the (A) oxidation and (B) reduction of

942 cytochrome *c* at 550nm in isolated mitochondria solubilized in 0.5% (w/v) DDM. Analysis *versus*

943 WT (\*) or *psd1Δpsd2Δ* (#) was performed by one-way ANOVA  $\pm$  S.E.M. for n=6 or n=4 for  $\rho^0$ . P

944 values for decreases that didn't achieve significance are reported in red and were analyzed by

945 student *t*-test. (C-G) Mitochondrial phospholipids from the indicated strains were labeled overnight

946 with  $^{32}\text{P}_i$  and separated by TLC. (C) Representative TLC plate for mitochondrial  $^{32}\text{P}_i$  lipids. (D-G)

947 Graphs representing quantitation of (D) mitochondrial PE and (G) cardiolipin levels show the

948 mean  $\pm$  S.E.M. for n=6 biological replicates. Significant differences compared to (\*) WT or (#)

949 *psd1Δpsd2Δ* were calculated by one-way ANOVA. (E) Representative TLC plate for cellular  $^{32}\text{P}_i$

950 lipids. (F) Quantitation of cellular PE levels representing the mean  $\pm$  S.E.M. for n=6 biological

951 replicates. Significant differences compared to (\*) WT or (#) *psd1Δpsd2Δ* were calculated by

952 student *t*-test.

953

954 **Fig 7. Depletion of PE through deletion of Cho1p impairs complex III and complex IV**

955 **activities.** (A) Metabolic pathways tied to PS synthesis by Cho1p in yeast. (B) Detection of the

956  $\beta$  subunit of Psd1p and Cho1p expression were verified in yeast whole cell extracts of the

957 indicated strains by immunoblot. Kgd1p served as a loading control. \*Cho1p, phosphorylated

958 Cho1p. (C) The indicated strains were spotted onto synthetic complete dextrose (SCD) medium

959 +/- 2mM ethanolamine (+E) and incubated at 30°C for 2 days. (D-J) Mitochondrial phospholipids

960 from the indicated strains were labeled overnight with  $^{32}\text{P}_i$ , separated by TLC, and quantitated

961 by phosphoimaging. All graphs show the mean  $\pm$  S.E.M. for n=6 biological replicates.

962 Significant differences compared to (\*) WT or (#) *psd1Δpsd2Δ* were calculated by one-way  
963 ANOVA. (K) The indicated strains were spotted and incubated at 30°C for 2 days on YPD and  
964 for 3 days on rich lactate (RL), and SCEG +/- 2mM ethanolamine (+E). (L,M)  
965 Spectrophotometric assay following the (L) reduction and (M) oxidation of cytochrome *c* at  
966 550nm in isolated mitochondria solubilized in 0.5% (w/v) DDM. Analysis *versus* WT by one-way  
967 ANOVA  $\pm$  S.E.M. for n=6 or n=3 for  $\rho^0$ . (N) Steady state expression of mitochondrial proteins in  
968 mitochondria isolated from the indicated strains.

969

970 **Fig 8. A PE-coordinating residue in Qcr7p is important for complex III activity.** (A) The  
971 crystal structure of yeast cytochrome *bc<sub>1</sub>* that modeled associated lipids was downloaded using  
972 PDB ID: 1KB9. Using PyMOL, the region containing the catalytic subunit Cob1p (magenta) near  
973 the matrix facing surface was enlarged to demonstrate hydrophobic interactions between this  
974 subunit and the acyl chains of PE. Arg51 of Qcr8p (orange) also shows hydrophobic interactions  
975 with a carbon atom from the ethanolamine headgroup. Glu82 of Qcr7p (blue) was predicted to  
976 form a hydrogen bonding interaction (3.4 Å distance) with the amine group of PE, whose atoms  
977 are depicted as spheres; *gray*: carbon, *red*: oxygen, and *blue*: nitrogen (hydrogen atoms are not  
978 represented). (B) WT and mutant Qcr7p was detected in yeast whole cell extracts of the indicated  
979 strains by immunoblot; Aac2p served as a loading control. (C) Mitochondria from the indicated  
980 strains were immunoblotted for subunits of complex III and complex IV as well as markers for the  
981 indicated mitochondrial compartments. (D)The indicated strains were spotted and incubated at  
982 30°C for 2 days on YPD and for 3 days on rich lactate (RL) and SCEG. (E, F) Spectrophotometric  
983 assay following the (E) reduction or (F) oxidation of cytochrome *c* at 550nm in isolated  
984 mitochondria solubilized in 0.5% (w/v) DDM. Analysis *versus* WT (\*) was performed by one-way  
985 ANOVA  $\pm$  S.E.M. for n=6 or n=3 for  $\rho^0$ . P values for decreases that didn't achieve significance are  
986 reported and were evaluated by student t-test *versus* WT.

987 **TABLES**

| <b>TABLE 1 - Strains used in this work</b> |                                                                                               |                             |
|--------------------------------------------|-----------------------------------------------------------------------------------------------|-----------------------------|
| <b>Strain</b>                              | <b>Genotype</b>                                                                               | <b>Source</b>               |
| <b>Parental</b>                            |                                                                                               |                             |
| GA74-1A                                    | <i>MATa, his3-11, 15, leu2, ura3, trp1, ade8 [rho+, mit+]</i>                                 | Carla Koehler               |
| <b>Deletions</b>                           |                                                                                               |                             |
| <i>psd1Δ</i>                               | <i>MATa, psd1Δ::HIS3MX6, leu2, ura3, trp1, ade8 [rho+, mit+]</i>                              | Ref. 29                     |
| <i>psd2Δ</i>                               | <i>MATa, psd2Δ::HIS3MX6, leu2, ura3, trp1, ade8 [rho+, mit+]</i>                              | Ref. 29                     |
| <i>psd1Δpsd2Δ</i>                          | <i>MATa, psd2Δ::HIS3MX6, leu2, ura3, psd1Δ::TRP1, ade8 [rho+, mit+]</i>                       | Ref. 29                     |
| <i>crd1Δ</i>                               | <i>MATa, his3-11, 15, leu2, ura3, crd1Δ::TRP1, ade8 [rho+, mit+]</i>                          | Ref. 67                     |
| $\rho^0$                                   | <i>MATa, his3-11, 15, leu2, ura3, trp1, ade8 [rho-, mit+]</i>                                 | This study                  |
| <i>cho1Δ</i>                               | <i>MATa, cho1Δ::HIS3MX6, leu2, ura3, trp1, ade8 [rho+, mit+]</i>                              | Ref. 29                     |
| <b>Integrations</b>                        |                                                                                               |                             |
| <i>psd1Δpsd2Δ::IM-Psd1</i>                 | <i>MATa, psd2Δ::HIS3MX6, Psd3XFLAG::LEU2, ura3, psd1Δ::TRP1, ade8 [rho+, mit+]</i>            | Ref. 29                     |
| <i>psd1Δpsd2Δ::OM-Psd1</i>                 | <i>MATa, psd2Δ::HIS3MX6, Tom20-Psd3XFLAG::LEU2, ura3, psd1Δ::TRP1, ade8 [rho+, mit+]</i>      | This study                  |
| <i>psd1Δpsd2Δ::ER-Psd1</i>                 | <i>MATa, psd2Δ::HIS3MX6, CPY*mPsd3XFLAG::LEU2, ura3, psd1Δ::TRP1, ade8 [rho+, mit+]</i>       | Ref. 29                     |
| <b>HI-CRISPR Edited</b>                    |                                                                                               |                             |
| <i>cho1Δpsd1Δpsd2Δ</i>                     | <i>MATa, psd2Δ::HIS3MX6, leu2, ura3, psd1Δ::TRP1, *cho1 HI-CRISPR ade8 [rho+, mit+]</i>       | This study                  |
| <i>Qcr7p E82R</i>                          | <i>MATa, his3-11, 15, leu2, ura3, trp1, ade8 [rho+, mit+] *Qcr7p<sup>E82R</sup> HI-CRISPR</i> | This study                  |
| <i>Qcr7p E82D</i>                          | <i>MATa, his3-11, 15, leu2, ura3, trp1, ade8 [rho+, mit+] *Qcr7p<sup>E82D</sup> HI-CRISPR</i> | This study                  |
| <b>Parental/Deletion</b>                   |                                                                                               |                             |
| W303                                       | <i>MATa, his3-11, ura3-1, 15, trp-1-1, ade2-1, can1-100 [rho+, mit+]</i>                      | Cathy Clarke                |
| <i>psd1Δ</i> W303                          | <i>MATa, psd1Δ::HIS3MX6, ura3-1, 15, trp1-1, ade2-1, can1-100</i>                             | This study<br>Carla Koehler |
| D2730-10B                                  | <i>MATa [rho+, mit+]</i>                                                                      | Carla Koehler               |
| <i>psd1Δ</i> D273-10B                      | <i>MATa, psd1Δ::KANMX6, [rho+, mit+]</i>                                                      | This study                  |
| BY4741                                     | <i>MATa, his3-1, le2-0, met15-0, ura3-0 [rho+, mit+]</i>                                      | Euroscarf                   |
| <i>psd1Δ</i> BY4741                        | <i>MATa, psd1Δ::KANMX4, his3-1, le2-0, met15-0, ura3-0 [rho+, mit+]</i>                       | Euroscarf                   |

988



989 **Supplementary Figures**  
990

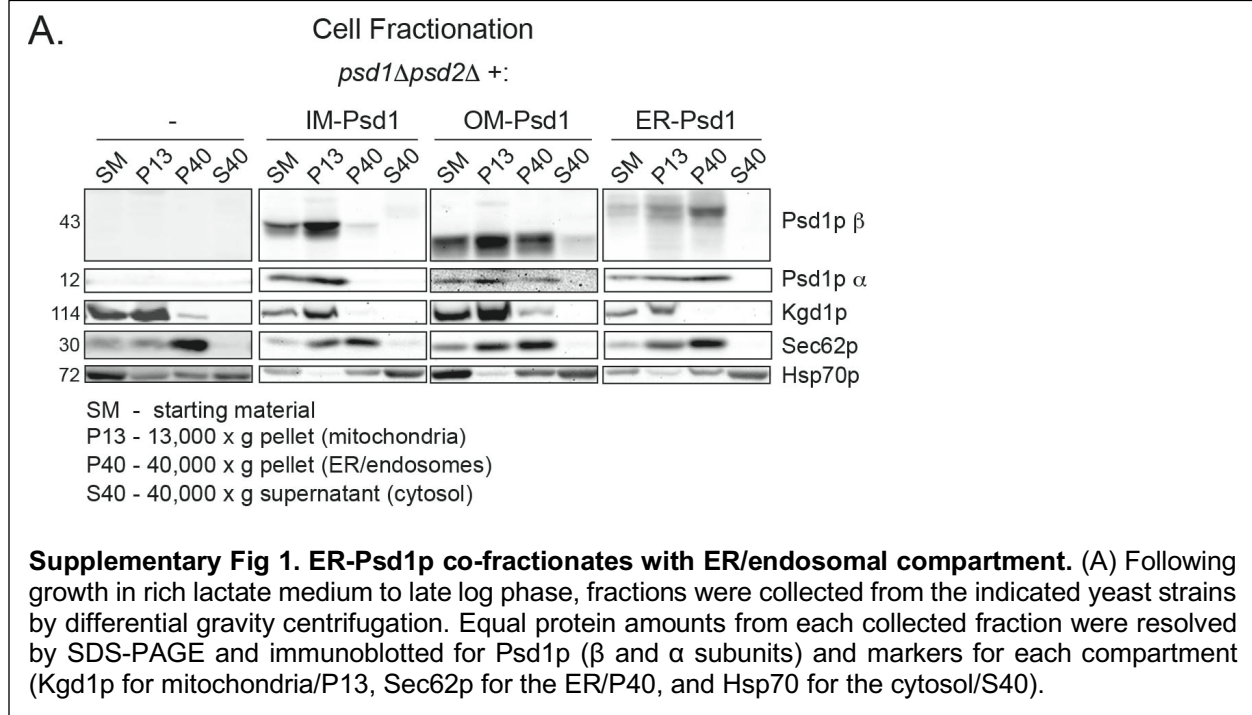

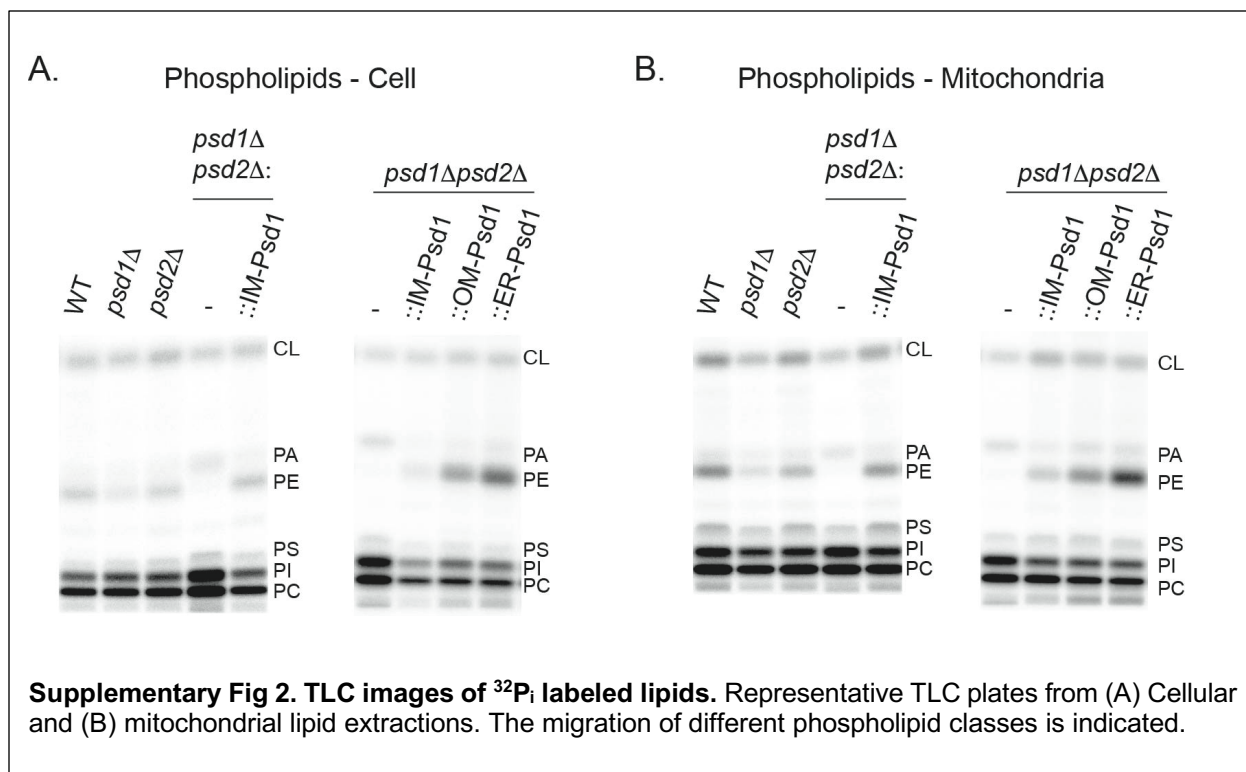

991  
992

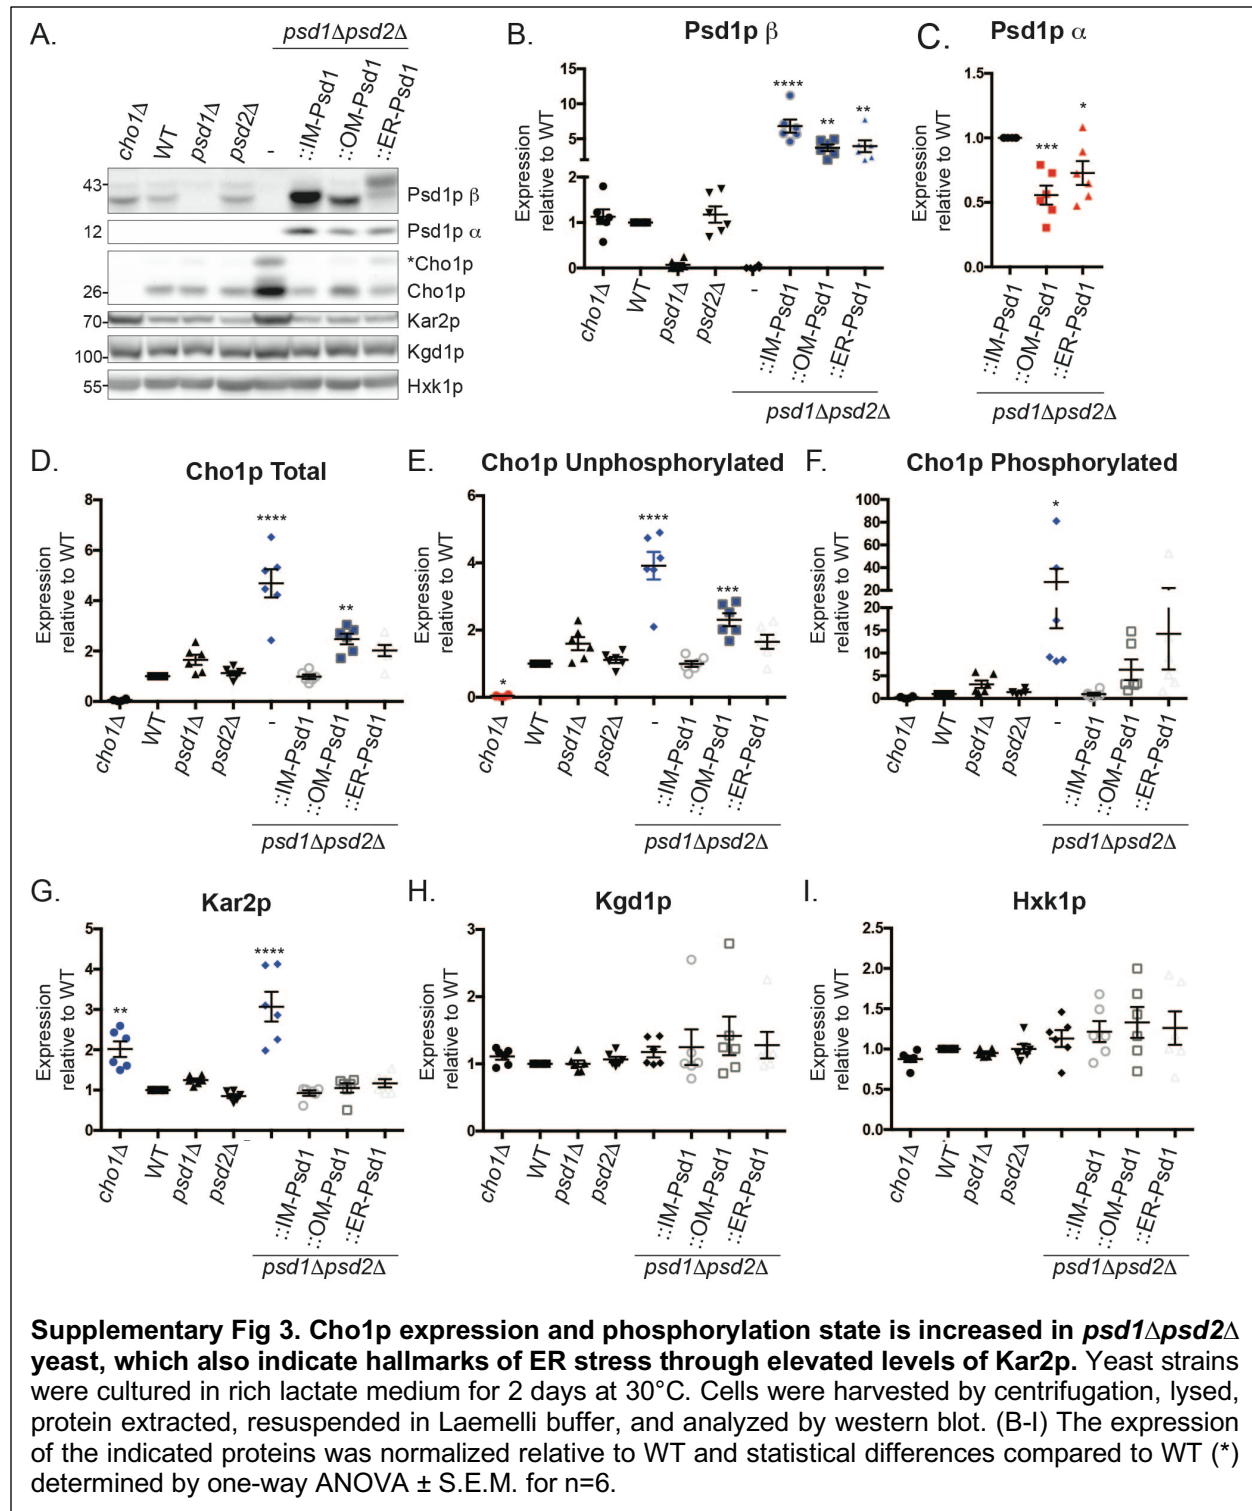

993

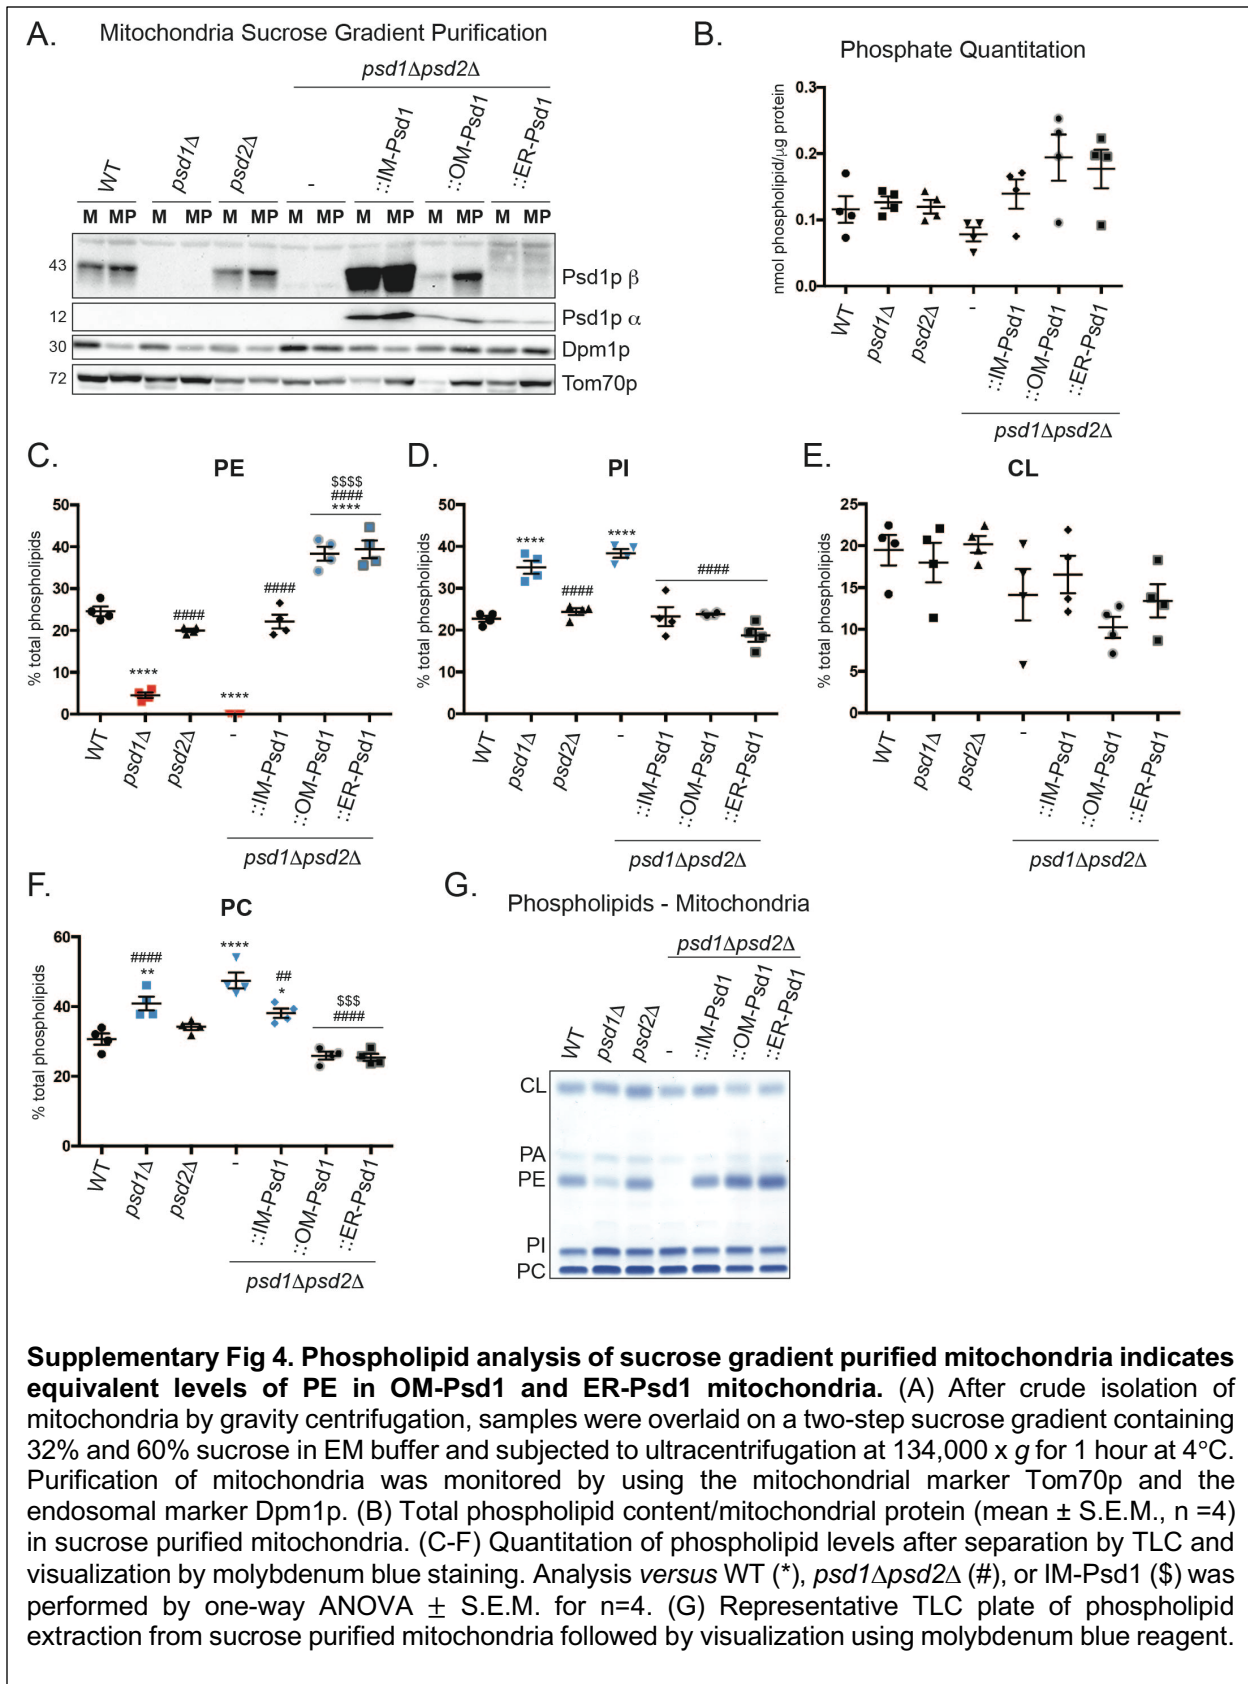



995

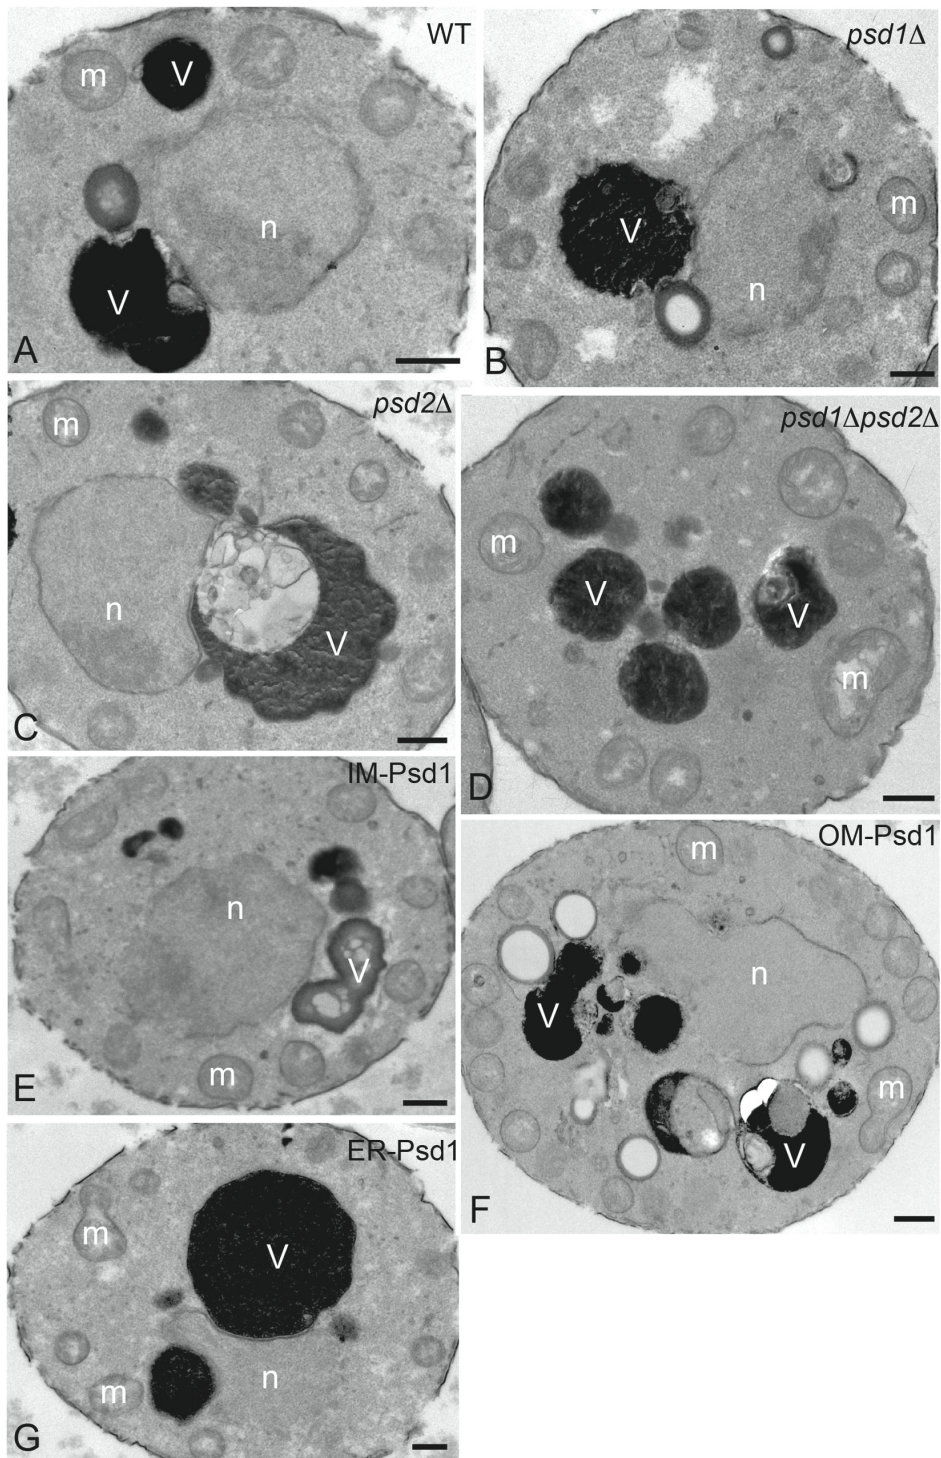

**Supplementary Fig 5. Mitochondrial morphology is not overtly affected by disruption or alteration of *Psd1* pathway.** Cells from the indicated strains were analyzed by transmission electron microscopy. A) GA74-1A parental wildtype strain, B) *psd1Δ*, C) *psd2Δ*, D) *psd1Δpsd2Δ*, E) *psd1Δpsd2Δ::IM-Psd1*, F) *psd1Δpsd2Δ::OM-Psd1*, G) *psd1Δpsd2Δ::ER-Psd1*. *n*, nucleus; *m*, mitochondria; and *v*, vacuole. Bars, 0.5  $\mu$ m.

996

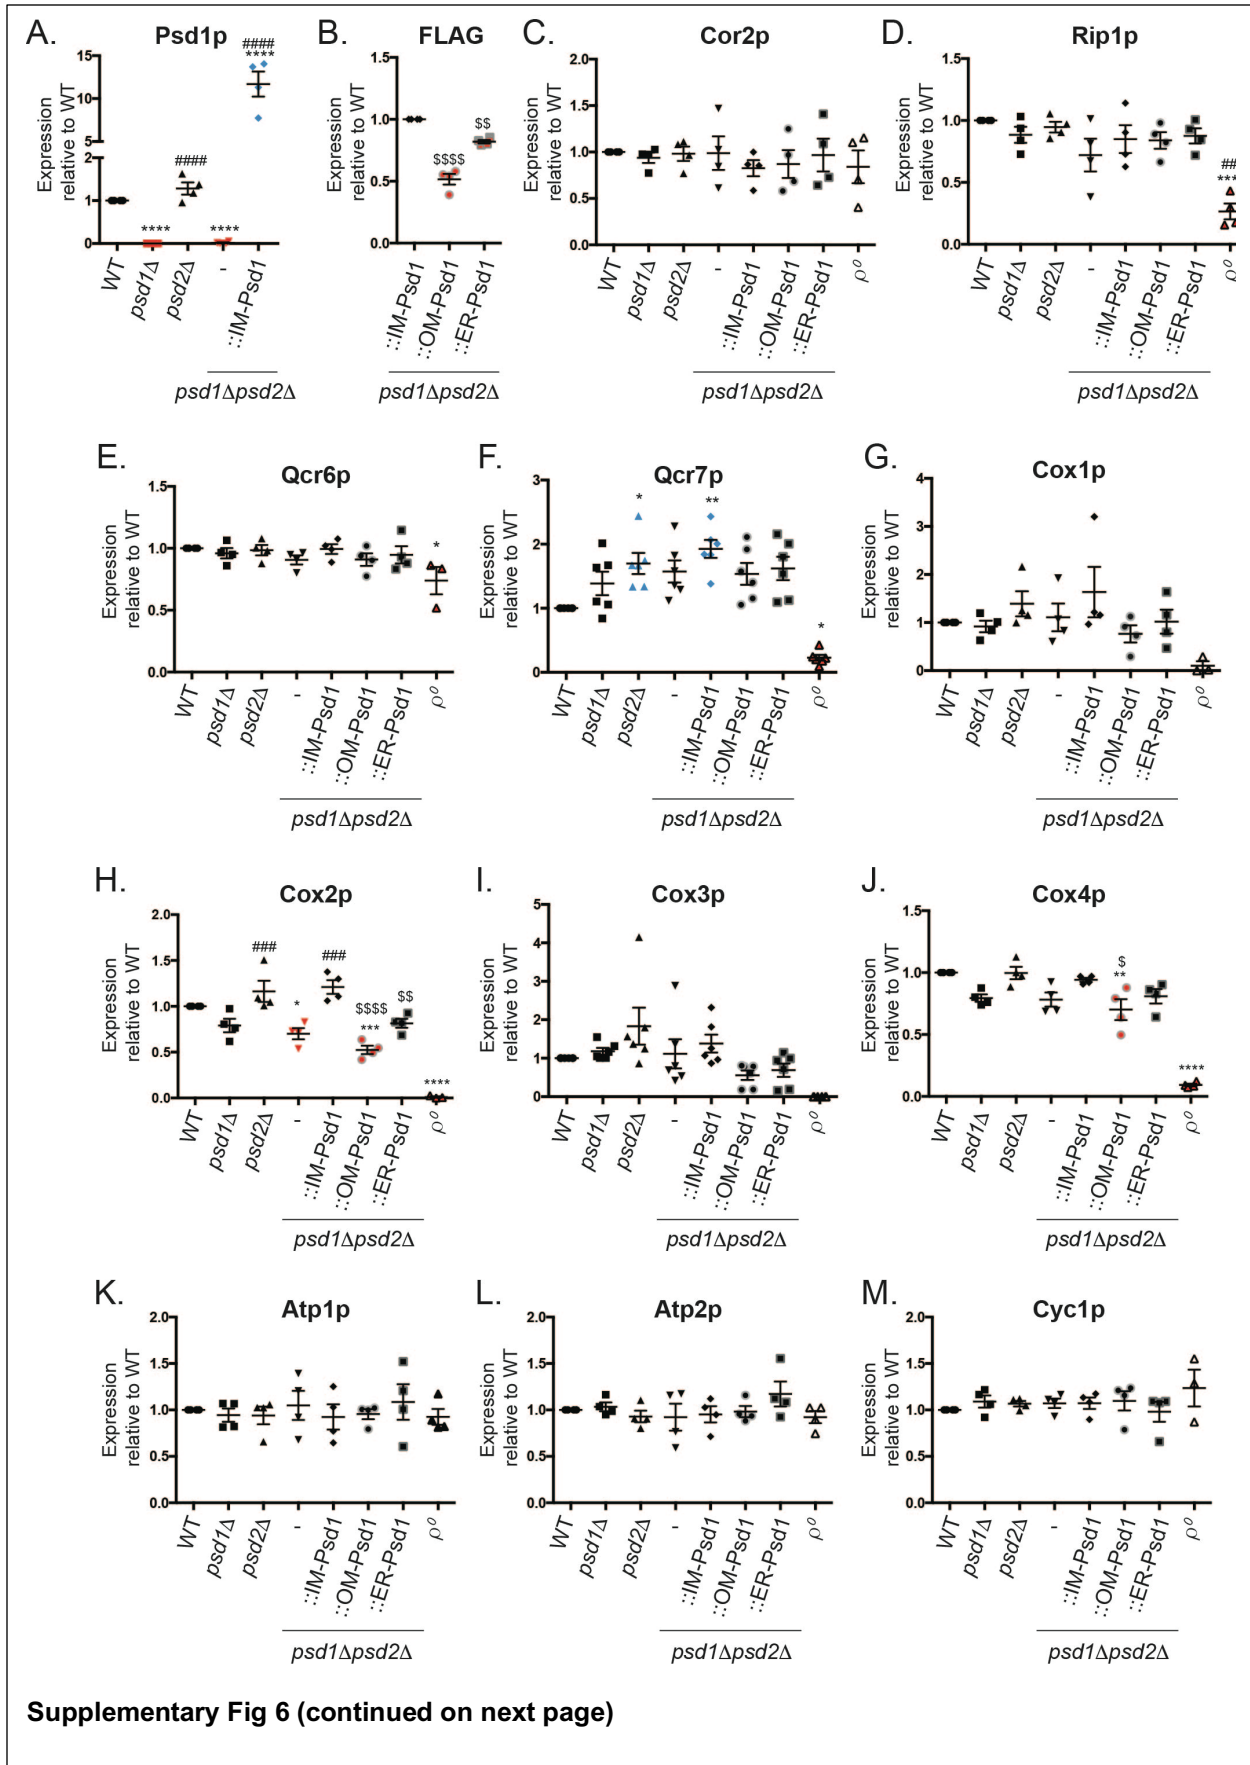



**Supplementary Fig 6. Quantitation of respiratory complex subunits.** Densitometry analysis of steady state protein amounts in isolated mitochondria (30  $\mu$ g) from the indicated strains (representative immunoblots shown in Fig 5C). Analysis versus WT (\*), *psd1 $\Delta$ psd2 $\Delta$*  (#), or IM-Psd1 (\$) was performed by one-way ANOVA  $\pm$  S.E.M. for n=4.

997

998

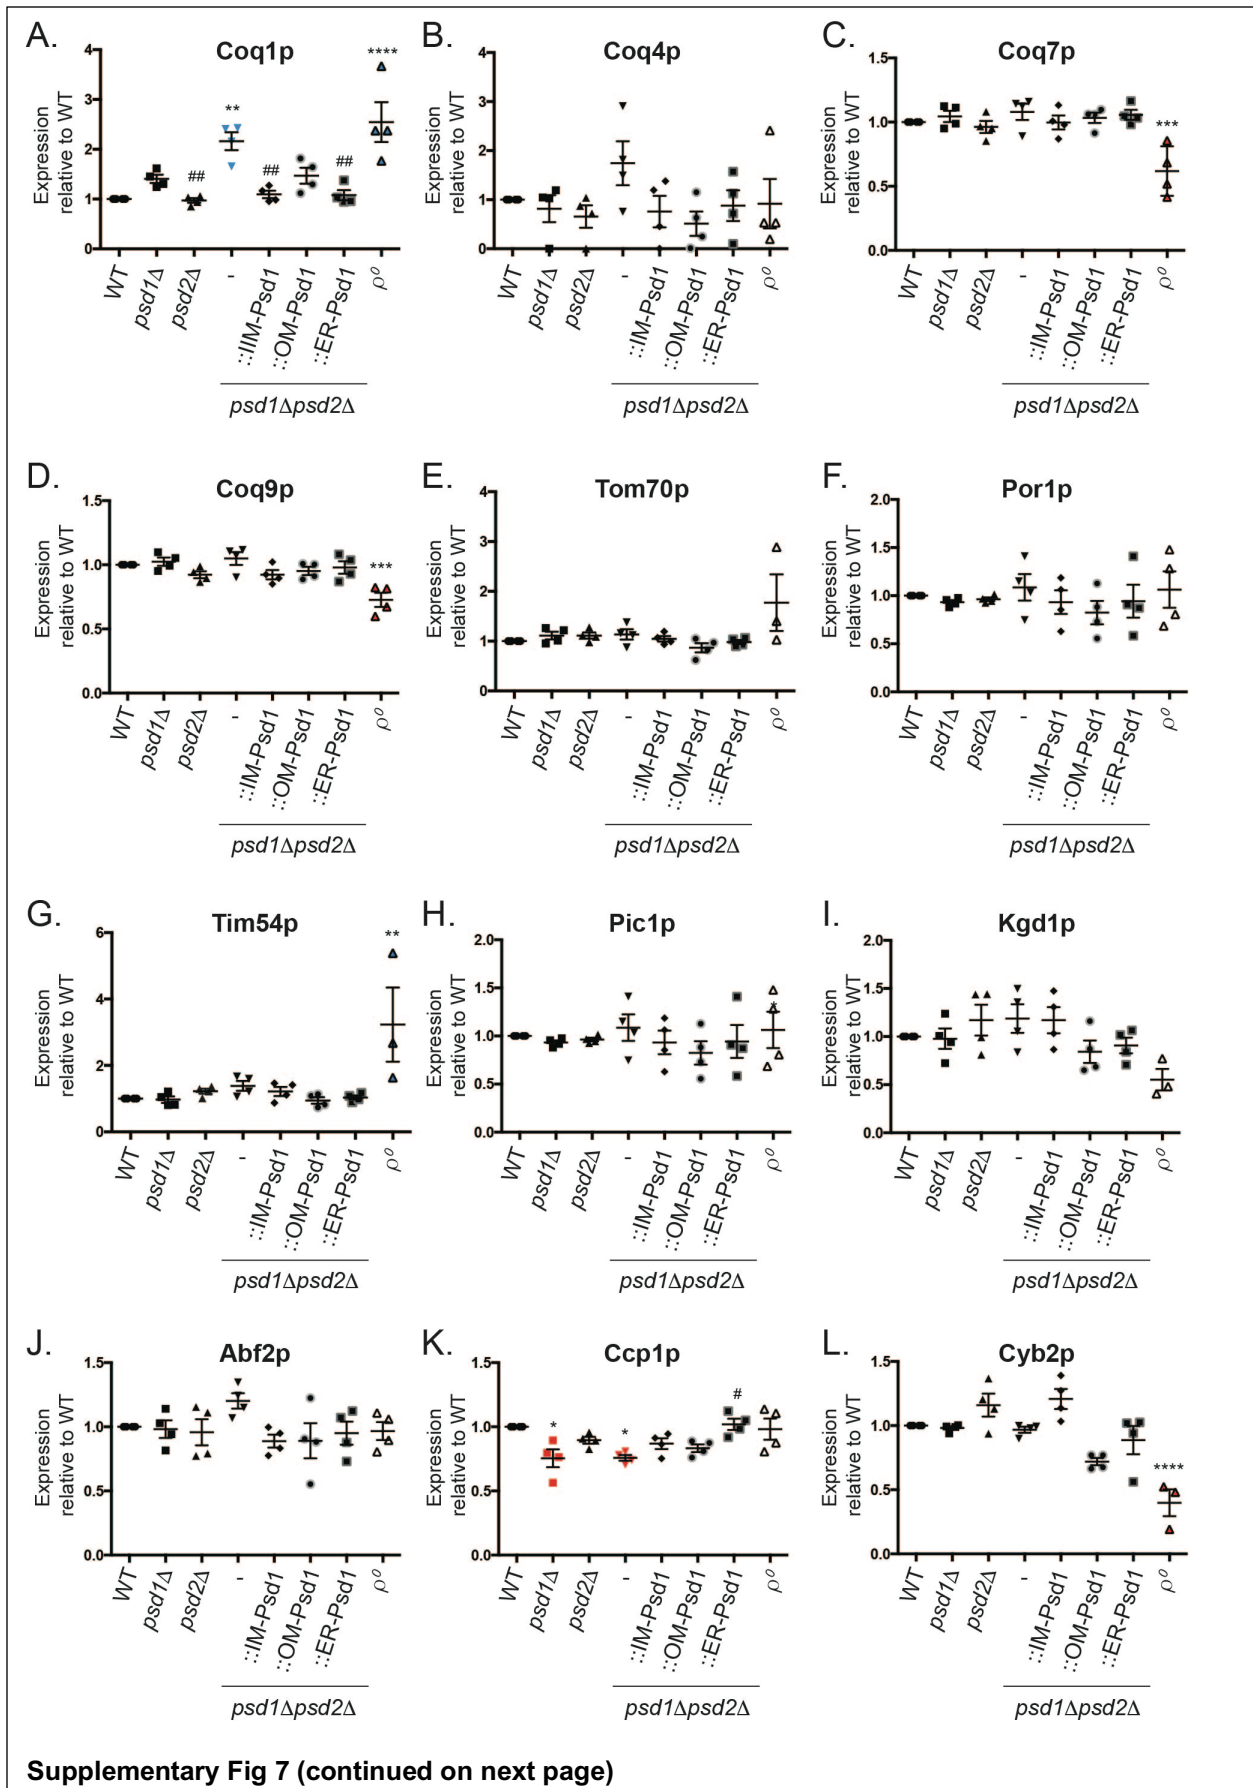

**Supplementary Fig 7. Quantitation of CoQ synthome subunits and additional mitochondrial proteins.** Densitometry analysis of steady state protein amounts in isolated mitochondria (30  $\mu$ g) from the indicated strains (representative immunoblots shown in Fig 5F). Analysis *versus* WT (\*) or *psd1 $\Delta$ psd2 $\Delta$*  (#) was performed by one-way ANOVA  $\pm$  S.E.M. for n=4.

999

1000

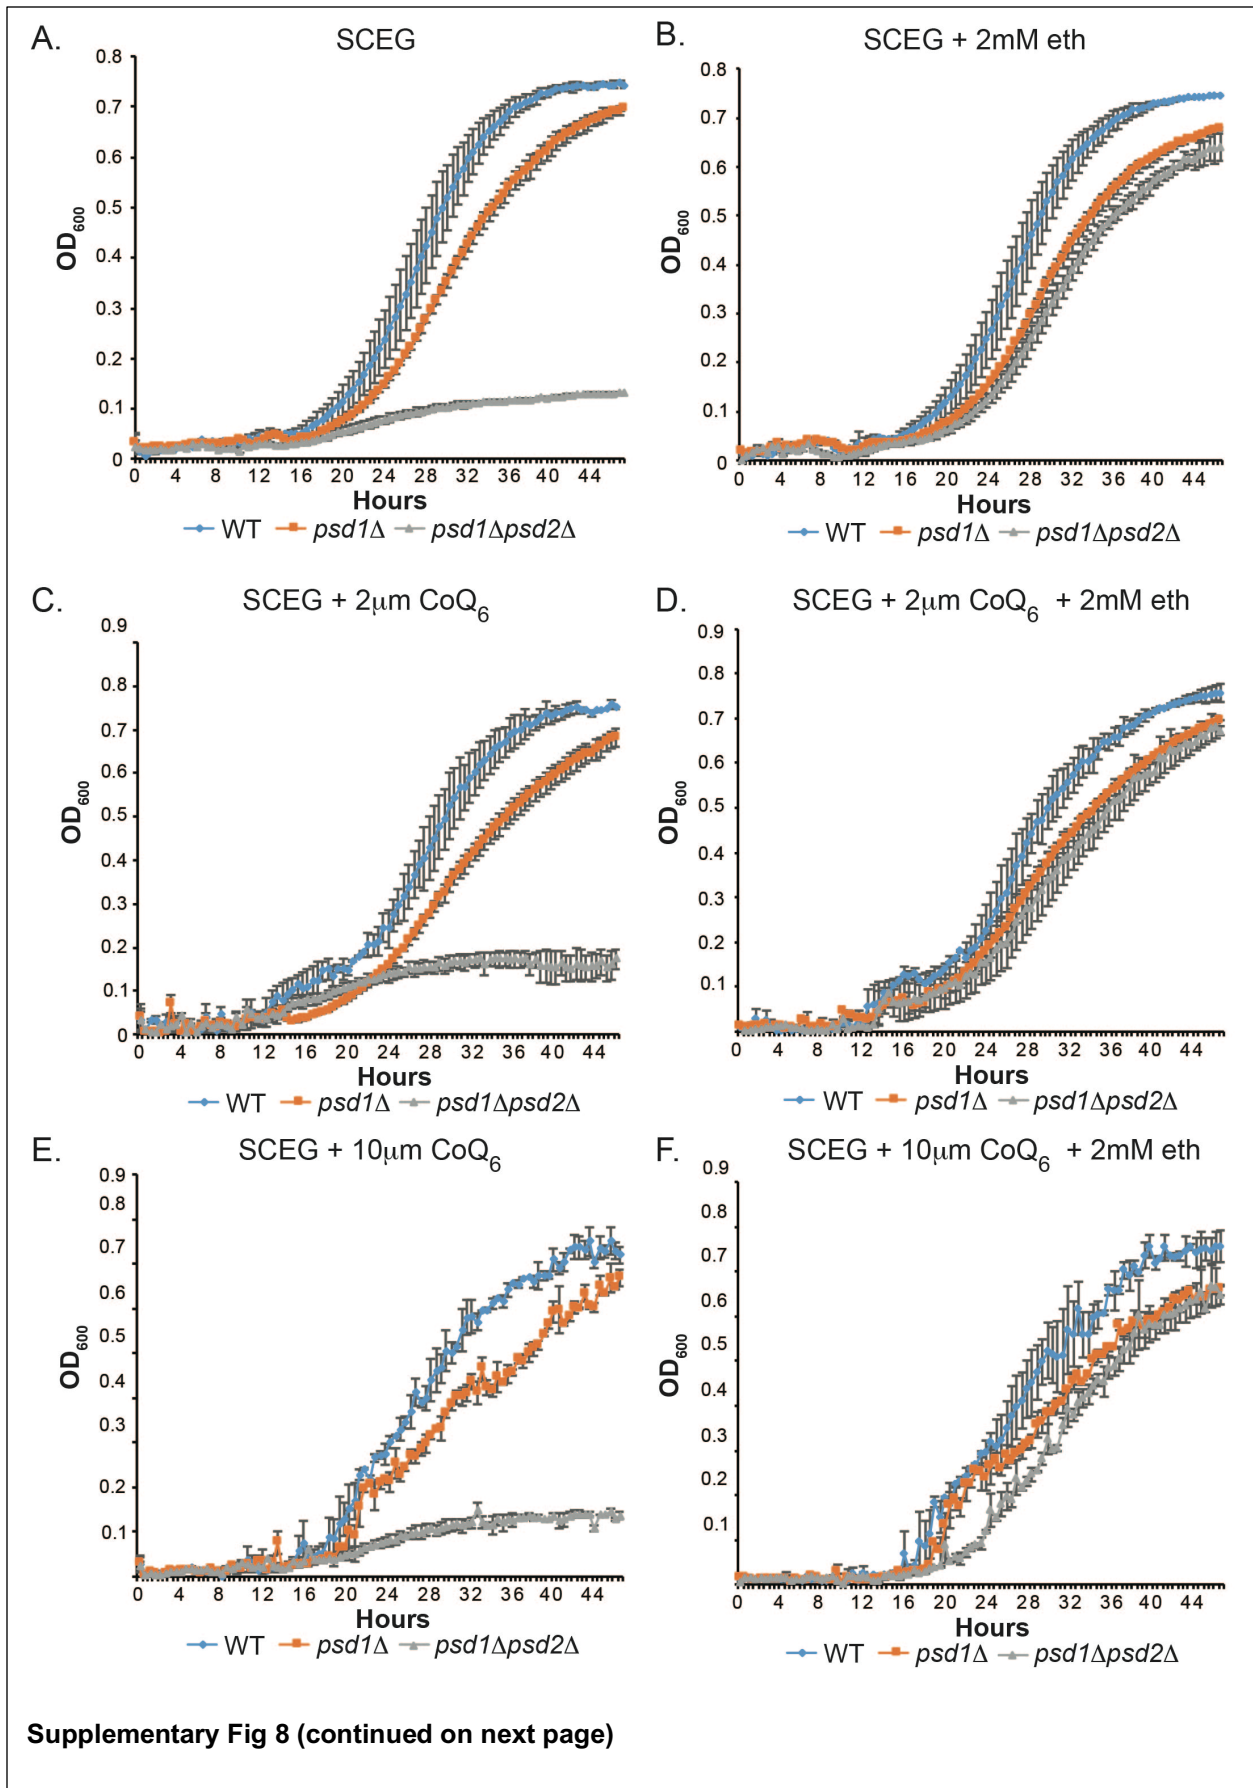

**Supplementary Fig 8. CoQ<sub>6</sub> supplementation does not rescue the *psd1*Δ and *psd1*Δ *psd2*Δ growth defects on respiratory medium.** OD<sub>600</sub> measurements were recorded every 30 minutes for a period of 48 hours at 30°C for yeast grown in (A) SCEG, (B) SCEG + 2mM ethanolamine (eth), (C) SCEG + 2μM CoQ<sub>6</sub>, (D) SCEG + 2μM CoQ<sub>6</sub> + 2mM ethanolamine, (E) SCEG + 10μM CoQ<sub>6</sub>, and (F) SCEG + 10μM CoQ<sub>6</sub> + 2mM ethanolamine. ± S.E.M. for n=2.

1001

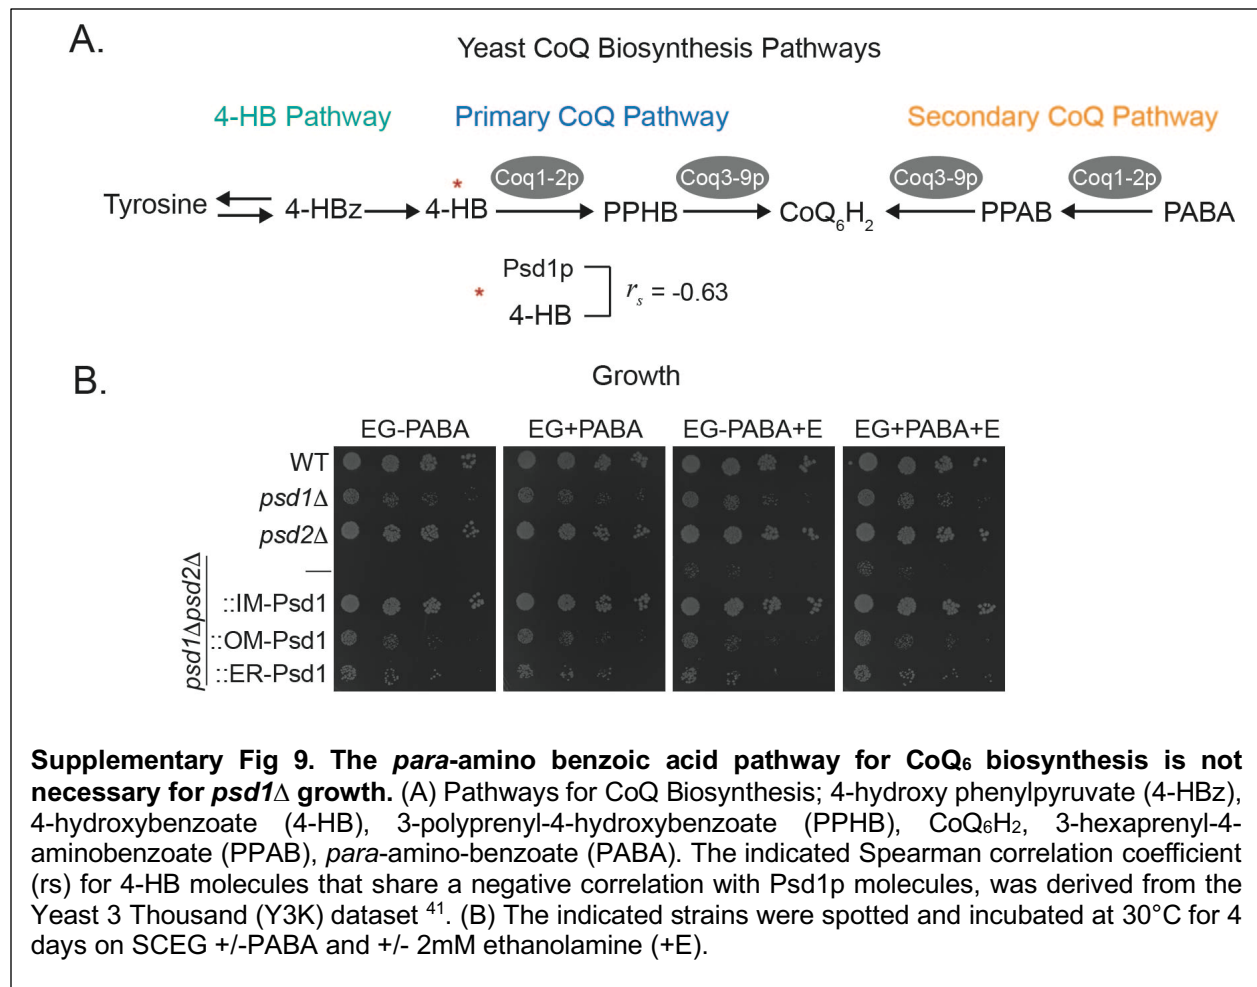

1002



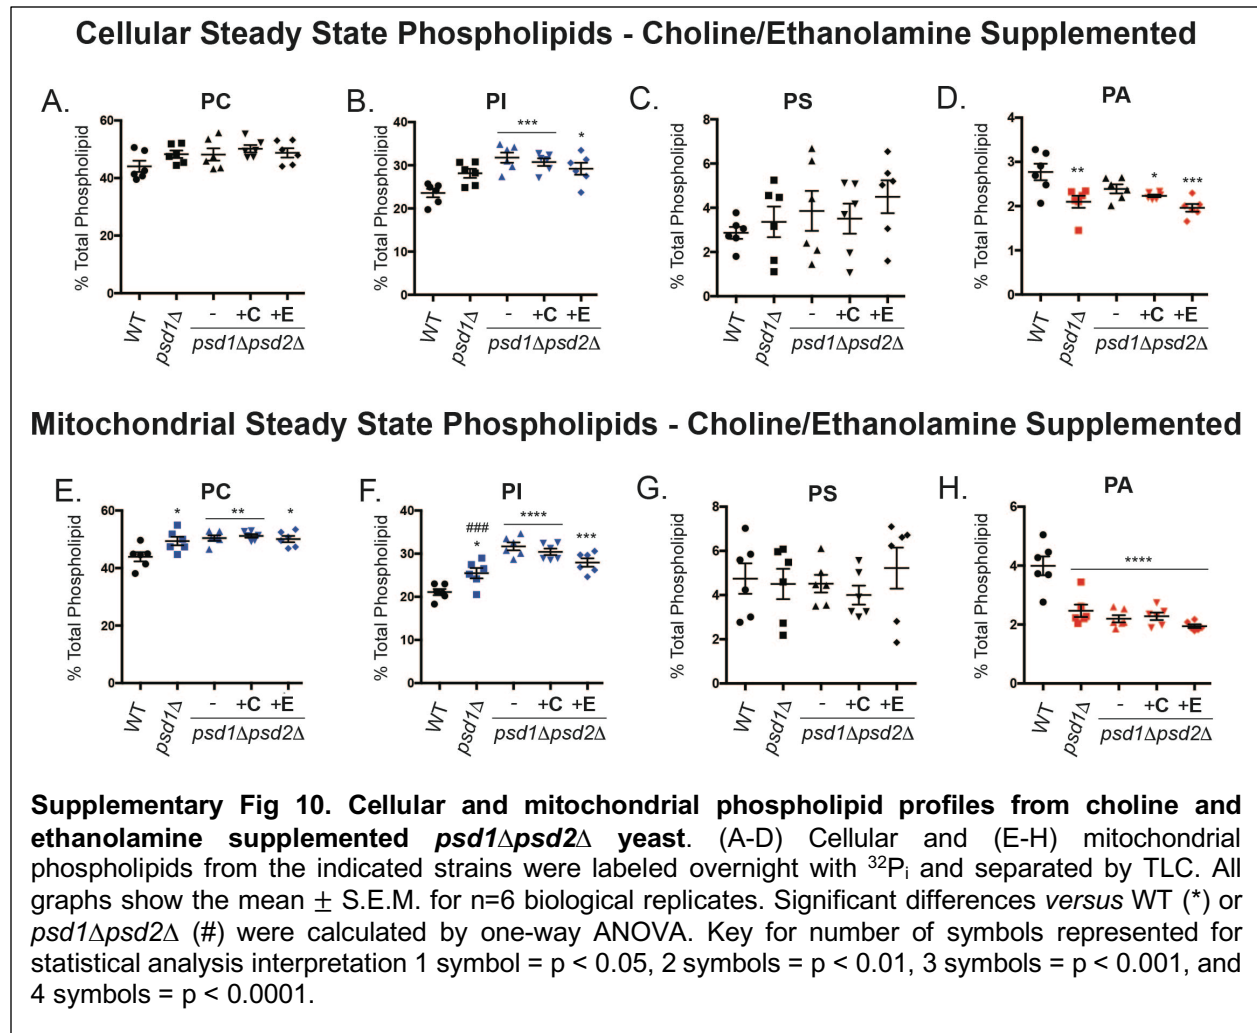

1003  
1004
